# Supplementary material
Source: Royal Society of Chemistry journal article supplement (doi:10.1039/d6cc01946c)
Supplement: d6cc01946c1.pdf [file d6cc01946c1.pdf]

Supporting Information for

**Ruthenium-Mediated *Phospha*-Buchner Ring Expansion:  
Phosphorus Insertion into a Pendant Arene**

Zhaoyang Li,<sup>[a]</sup> Ren Gao,<sup>[a]</sup> Shaoguang Zhang\*<sup>[a]</sup>

<sup>[a]</sup> *Key Laboratory of Bioorganic Phosphorus Chemistry and Chemical Biology  
(Ministry of Education), Department of Chemistry, Tsinghua University, Beijing  
100084, China*

E-mail: sgzhang@tsinghua.edu.cn

**Table of Contents**

|                                                                              |     |
|------------------------------------------------------------------------------|-----|
| 1. Experimental Details and Characterization Data for All New Compounds..... | S2  |
| 2. Summary of Crystal Data .....                                             | S4  |
| 3. Spectroscopic Data .....                                                  | S6  |
| 4. Details of Computational Results .....                                    | S12 |
| 5. References .....                                                          | S39 |

## Experimental Details and Characterization Data for All New Compounds

**General Methods.** All reactions were performed using standard Schlenk techniques, or in a Vigor glovebox under an inert atmosphere of N<sub>2</sub>. Glassware, stir bars, filter aid (Celite) and 4Å molecular sieves were dried in an oven at 105 °C for at least 12 h prior to use. Solvents (*n*-pentane, tetrahydrofuran, diethyl ether) were dried over sodium benzophenone ketyl, deoxygenated by sparging with N<sub>2</sub> for 15 min, and stored over 4Å molecular sieves. Deuterated solvents were purchased from J&K or Cambridge Isotope Laboratories, Inc., and dried over potassium mirror (C<sub>6</sub>D<sub>6</sub>, toluene-d<sub>8</sub>), distilled and stored under N<sub>2</sub> over activated 4Å molecular sieves.

Commercial reagents were purchased from J&K Scientific, Leyan, Bidepharm and other domestic manufacturers. Solid chemicals were used without further purification, while liquid reagents were filtered through a Al<sub>2</sub>O<sub>3</sub> column and degassed by a freeze-pump-thaw operation. <sup>1</sup>H, <sup>13</sup>C{<sup>1</sup>H}, <sup>31</sup>P{<sup>1</sup>H}, <sup>1</sup>H-<sup>13</sup>C HSQC and <sup>1</sup>H-<sup>13</sup>C HMBC spectra were recorded on Bruker Avance III HD 400 MHz or Bruker AV-HD-600X 600 MHz spectrometers at 25 °C, unless otherwise stated. All chemical shifts (δ) are reported in units of ppm, with references to the residues protio-solvent resonance for proton and carbon chemical shifts. <sup>1</sup>H NMR spectroscopy: 7.16 ppm (C<sub>6</sub>D<sub>6</sub>). <sup>13</sup>C NMR spectroscopy: 128.06 ppm (C<sub>6</sub>D<sub>6</sub>). Elemental analysis was performed on a Vario EL CUBE elemental analyzer (Elementar, Germany) following the standard method JY/T 0580-2020 (General rules for elemental analyzers).

**X-ray Crystallography.** Data collection was performed on a Rigaku XtaLAB Supernova diffractometer with an HyPix area detector with confocal multilayer optic-monochromated Cu-Kα radiation (λ = 1.54184 Å) at 100 K. The structures were solved by intrinsic phasing using SHELXT and refined by full-matrix least-squares on F<sup>2</sup> with SHELXL-2018. CCDC entries Cp<sup>\*</sup>Ru(Idmop)Cl (**2**) 2537157, Cp<sup>\*</sup>Ru(P-Idmop)(CO) (**3**) 2537158, contain the supplementary crystallographic data for this paper. These data can be obtained free of charge from the Cambridge Crystallographic Data Centre. Crystal parameters and refinement results are given in **Table S1**.

**Synthesis of Cp<sup>\*</sup>Ru(Idmop)Cl (**2**).** Idmop·HCl was prepared according to the literature procedure<sup>1</sup> and subsequently converted to Idmop·HBF<sub>4</sub> by counterion exchange in aqueous tetrafluoroborate solution. Idmop·HBF<sub>4</sub> (103 mg, 0.24 mmol) was dissolved in THF (3 mL) and cooled to -30 °C. A solution of <sup>t</sup>BuOK (26 mg, 0.24 mmol) in THF (2 mL) was added dropwise. After 3 min, the solution became clear and colorless. A solution of [Cp<sup>\*</sup>RuCl]<sub>4</sub> (26 mg, 0.06 mmol) in THF (3 mL) was then added, and the reaction mixture was allowed to stir at room temperature for 3 h, giving a brownish-purple solution. Volatiles were removed under reduced pressure, and the residue was extracted with petroleum ether/Et<sub>2</sub>O (1:1). The extract

was filtered through a pad of Celite. Single crystals suitable for X-ray diffraction were obtained by storing a saturated filtrate at  $-35\text{ }^{\circ}\text{C}$  for one week. Yield 45 mg (31 %).  $^1\text{H}$  NMR (500 MHz,  $\text{C}_6\text{D}_6$ , 298 K)  $\delta$  6.99 (t,  $^3J_{\text{HH}} = 8.4$  Hz, 2H, Ar *p*-H), 6.42 (dd,  $^3J_{\text{HH}} = 8.4$ ,  $^4J_{\text{HH}} = 1.3$  Hz, 2H, Ar *m*-H), 6.26 (dd,  $^3J_{\text{HH}} = 8.4$ ,  $^4J_{\text{HH}} = 1.2$  Hz, 2H, Ar *m*-H), 4.31 – 4.23 (m, 2H,  $\text{NCH}_2$ ), 3.80 (s, 6H,  $\text{OCH}_3$ ), 3.52 – 3.45 (m, 2H,  $\text{NCH}_2$ ), 3.39 (s, 6H,  $\text{OCH}_3$ ), 1.37 (s, 15H,  $\text{Cp}^* \text{CH}_3$ ).  $^{13}\text{C}$  NMR (126 MHz,  $\text{C}_6\text{D}_6$ , 298 K)  $\delta$  232.76 (s, NHC *carbene*-C), 158.99 (s, Ar *o*-C), 156.37 (s, Ar *o*-C), 127.30 (s, Ar *p*-C), 121.21 (s, Ar *ipso*-C), 105.42 (s, Ar *m*-C), 103.52 (s, Ar *m*-C), 74.68 (s,  $\text{Cp}^* \text{CCH}_3$ ), 56.07 (s,  $\text{OCH}_3$ ), 54.90 (s,  $\text{OCH}_3$ ), 50.90 (s,  $\text{NCH}_2$ ), 10.23 (s,  $\text{Cp}^* \text{CH}_3$ ). Anal. Calcd. for  $\text{C}_{29}\text{H}_{37}\text{ClN}_2\text{O}_4\text{Ru}$ : C, 56.71; H, 6.07; N, 4.56. Found: C, 56.72; H, 6.07; N, 4.56.

**Synthesis of  $\text{Cp}^*\text{Ru}(\text{P-Idmop})(\text{CO})$  (3).** Sodium phosphoethynolate ( $\text{NaOCP}^*(\text{dioxane})_2$ , 12 mg, 0.042 mmol) was added into a solution of  $\text{Cp}^*\text{Ru}(\text{Idmop})\text{Cl}$  (26 mg, 0.042 mmol) in 1 mL  $\text{C}_6\text{D}_6$  and the resulting solution was allowed to stir under room temperature for 24 h, forming an orange solution. All volatile materials were removed under vacuum. The residues were extracted by  $\text{Et}_2\text{O}$  and filtered through celite. Single crystals of the product suitable for crystallographic analysis were grown by storing the saturated filtrate at  $-35\text{ }^{\circ}\text{C}$  for a week. Yield 22 mg (85 %).  $^1\text{H}$  NMR (600 MHz,  $\text{C}_6\text{D}_6$ , 298 K)  $\delta$  7.01 (t,  $^3J_{\text{HH}} = 8.4$  Hz, 1H, Ar *p*-H), 6.57 (dd,  $^3J_{\text{HH}} = 11.4$ ,  $^4J_{\text{HH}} = 6.5$  Hz, 1H, Ar  $\text{PCCHCHCH}$ ), 6.37 (dd,  $^3J_{\text{HH}} = 8.5$ ,  $^4J_{\text{HH}} = 1.2$  Hz, 1H, Ar *m*-H), 6.33 (dd,  $^3J_{\text{HH}} = 11.5$ ,  $^4J_{\text{HH}} = 1.2$  Hz, 1H,  $\text{PCCHCHCH}$ ), 6.21 (dd,  $^3J_{\text{HH}} = 8.5$ ,  $^4J_{\text{HH}} = 1.2$  Hz, 1H, Ar *m*-H), 5.70 – 5.62 (m, 1H,  $\text{PCCHCHCH}$ ), 4.05 (td,  $^3J_{\text{HH}} = 11.4$ ,  $^4J_{\text{HH}} = 8.2$  Hz, 1H,  $\text{NCH}_2\text{CH}_2$ ), 3.72 – 3.66 (m, 1H,  $\text{NCH}_2\text{CH}_2$ ), 3.63 (s, 3H,  $\text{OCH}_3$ ), 3.62 – 3.56 (m, 1H,  $\text{NCH}_2\text{CH}_2$ ), 3.53 (s, 3H,  $\text{OCH}_3$ ), 3.26 (s, 3H,  $\text{OCH}_3$ ), 3.21 (s, 3H,  $\text{OCH}_3$ ), 3.21 – 3.14 (m, 1H,  $\text{NCH}_2\text{CH}_2$ ), 1.73 (s, 15H,  $\text{Cp}^* \text{CH}_3$ ).  $^{13}\text{C}$  NMR (151 MHz,  $\text{C}_6\text{D}_6$ , 298 K)  $\delta$  217.63 (s, CO), 210.91 (s, NHC), 157.82 (d,  $^4J_{\text{CP}} = 29.1$ , *ipso*-C), 140.32 (br, Ar  $\text{PCCHCHCHC}$ ), 130.52 (s, Ar  $\text{PCCHCHCH}$ ), 128.75 (s, Ar *p*-C), 128.47 (s, Ar *o*-C), 122.39 (br,  $\text{PCCHCHCH}$ ), 120.48 (s, Ar *o*-C), 104.69 (s, Ar *m*-C), 103.52 (s, Ar *m*-C), 102.91 (d,  $^3J_{\text{CP}} = 17.2$ ,  $\text{PCCHCHCH}$ ), 95.76 (s,  $\text{Cp}^* \text{CCH}_3$ ), 59.52 (s,  $\text{OCH}_3$ ), 56.14 (s,  $\text{OCH}_3$ ), 55.47 (s,  $\text{OCH}_3$ ), 54.62 (s,  $\text{OCH}_3$ ), 51.87 (s,  $\text{NCH}_2\text{CH}_2$ ), 48.77 (s,  $\text{NCH}_2\text{CH}_2$ ), 10.18 (d,  $^3J_{\text{CP}} = 17.2$ ,  $\text{Cp}^* \text{CCH}_3$ ).  $^{31}\text{P}$  NMR (162 MHz,  $\text{C}_6\text{D}_6$ , 298 K)  $\delta$  26.45 (s,  $\text{RuP}$ ).

## Summary of Crystal Data

**Table S1.** Summary of crystallographic data for compounds reported in this work.

| Complexes                                   | 2                                                                                               | 3                                                                 |
|---------------------------------------------|-------------------------------------------------------------------------------------------------|-------------------------------------------------------------------|
| Empirical formula                           | C <sub>87</sub> H <sub>111</sub> Cl <sub>3</sub> N <sub>6</sub> O <sub>12</sub> Ru <sub>3</sub> | C <sub>34</sub> H <sub>47</sub> N <sub>2</sub> O <sub>6</sub> PRu |
| Formula weight                              | 1842.37                                                                                         | 711.77                                                            |
| Temperature/K                               | 99.9(4)                                                                                         | 173.00(10)                                                        |
| Crystal system                              | monoclinic                                                                                      | monoclinic                                                        |
| Space group                                 | I2/a                                                                                            | P21/c                                                             |
| a/Å                                         | 20.3926(2)                                                                                      | 12.01230(10)                                                      |
| b/Å                                         | 14.92420(10)                                                                                    | 12.97590(10)                                                      |
| c/Å                                         | 55.1682(6)                                                                                      | 22.1429(2)                                                        |
| α/°                                         | 90                                                                                              | 90                                                                |
| β/°                                         | 90.1730(10)                                                                                     | 91.1850(10)                                                       |
| γ/°                                         | 90                                                                                              | 90                                                                |
| Volume/Å <sup>3</sup>                       | 16790.0(3)                                                                                      | 3450.69(5)                                                        |
| Z                                           | 8                                                                                               | 4                                                                 |
| ρ <sub>calc</sub> /g•cm <sup>-3</sup>       | 1.458                                                                                           | 1.370                                                             |
| μ/mm <sup>-1</sup>                          | 5.708                                                                                           | 4.479                                                             |
| F(000)                                      | 7632.0                                                                                          | 1488.0                                                            |
| Radiation                                   | Cu Kα (λ = 1.54184)                                                                             | Cu Kα (λ = 1.54184)                                               |
| 2θ range for data collection/°              | 6.136 to 154.776                                                                                | 7.36 to 153.634                                                   |
| Index ranges                                | -25 ≤ h ≤ 25<br>-18 ≤ k ≤ 13<br>-69 ≤ l ≤ 68                                                    | -14 ≤ h ≤ 15<br>-15 ≤ k ≤ 16<br>-27 ≤ l ≤ 27                      |
| Reflections collected                       | 109188                                                                                          | 22014                                                             |
| Independent reflections                     | 17450 [Rint = 0.0411,<br>Rsigma = 0.0233]                                                       | 7011 [Rint = 0.0250,<br>Rsigma = 0.0232]                          |
| Data/restraints/parameters                  | 17450/0/1027                                                                                    | 7011/0/409                                                        |
| Goodness-of-fit on F <sup>2</sup>           | 1.035                                                                                           | 1.036                                                             |
| Final R indexes [I>=2σ (I)]                 | R1 = 0.0377<br>wR2 = 0.0946                                                                     | R1 = 0.0238<br>wR2 = 0.0621                                       |
| Final R indexes [all data]                  | R1 = 0.0404<br>wR2 = 0.0962                                                                     | R1 = 0.0252<br>wR2 = 0.0629                                       |
| Largest diff. peak/hole / e Å <sup>-3</sup> | 0.97/-1.50                                                                                      | 0.41/-0.52                                                        |

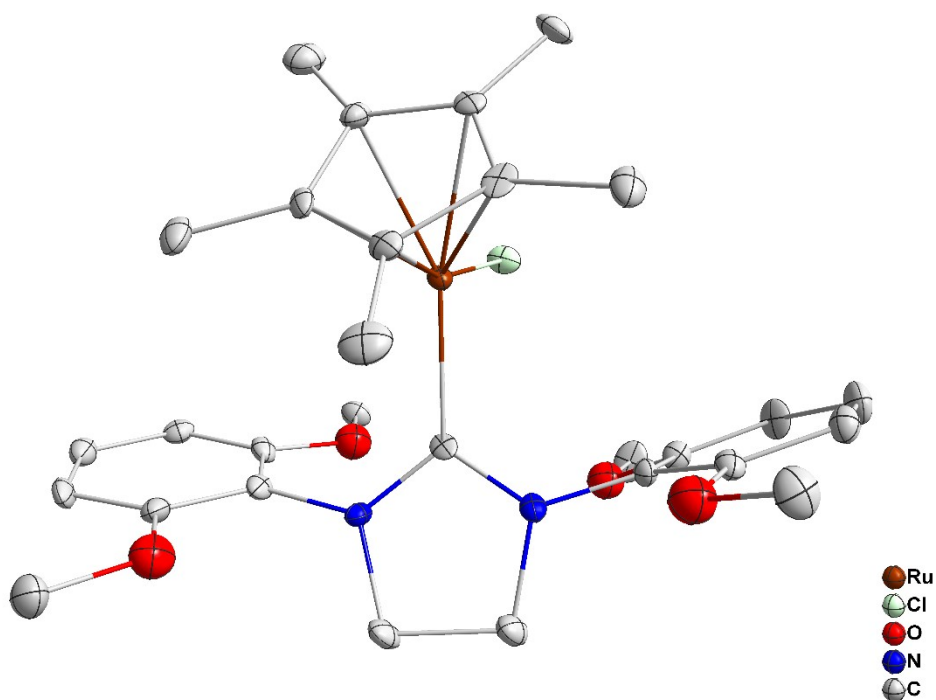

**Figure S1.** Crystallographic structure of **2**, with thermal ellipsoids at 30% probability level. Hydrogen atoms were omitted for clarity.

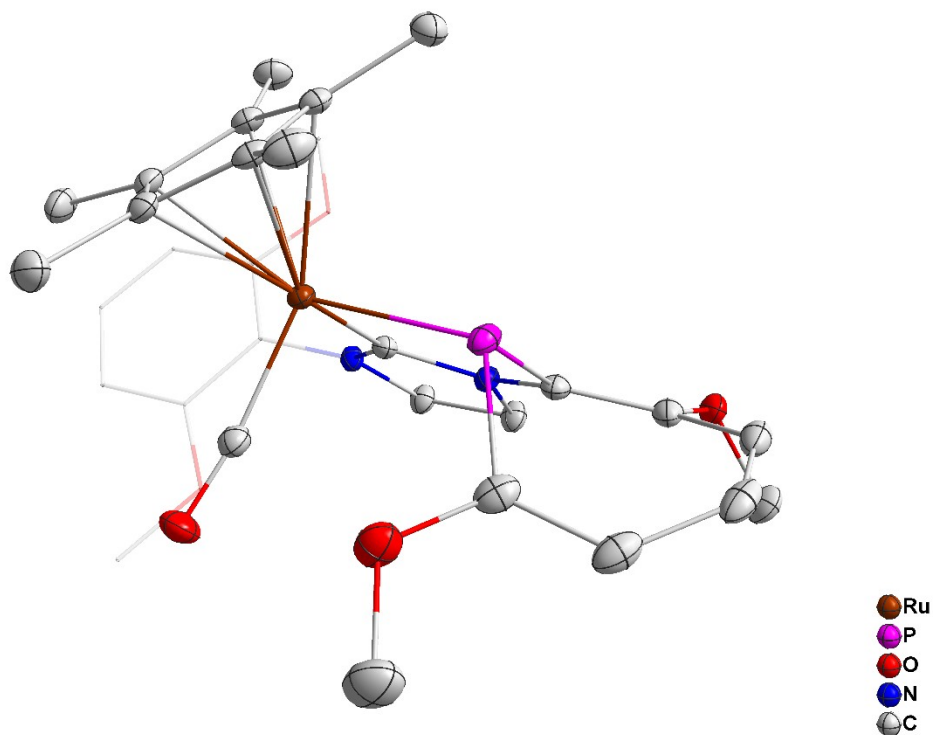

**Figure S2.** Crystallographic structure of **3**, with thermal ellipsoids at 30% probability level. Hydrogen atoms were omitted for clarity.

## Spectroscopic Data

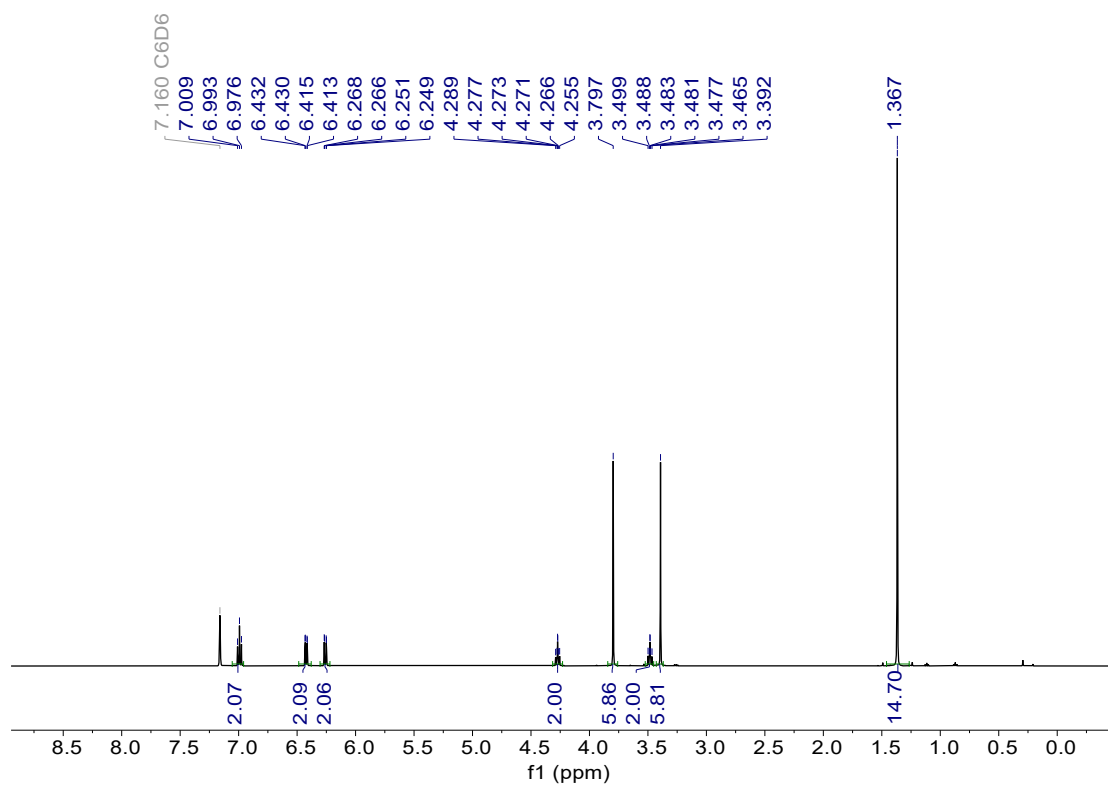

**Figure S3.** <sup>1</sup>H NMR spectrum of **2** in C<sub>6</sub>D<sub>6</sub> (298 K).

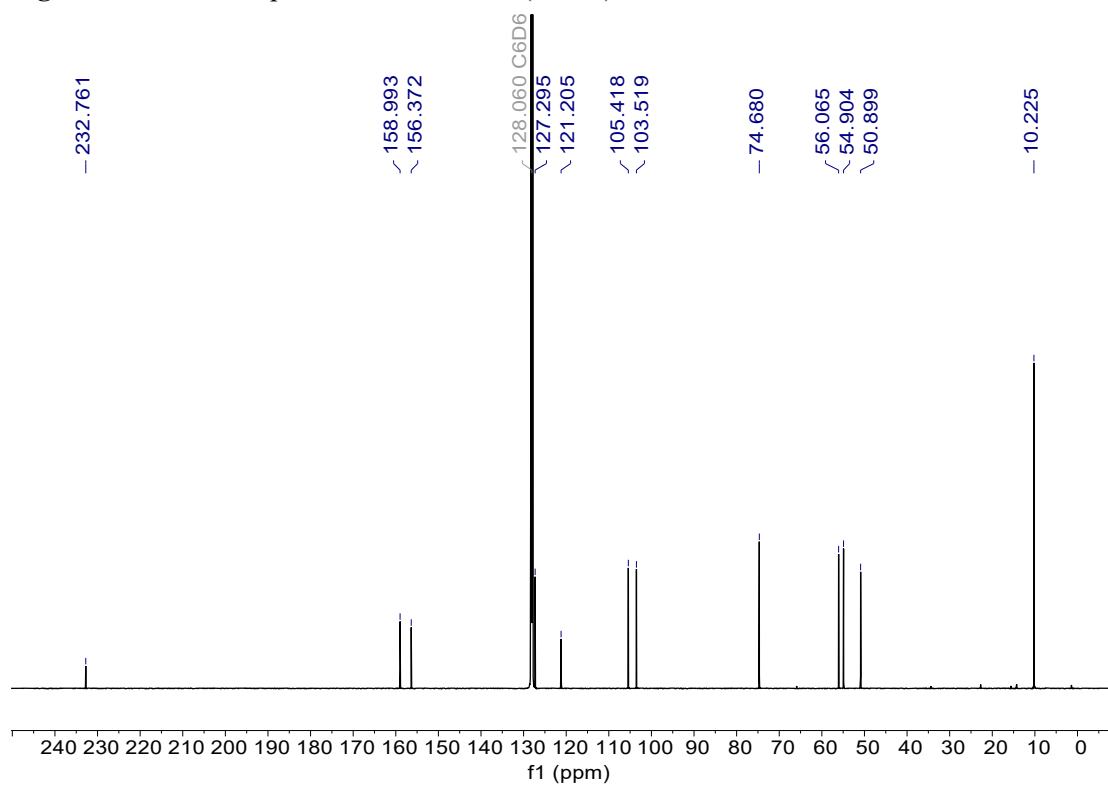

**Figure S4.** <sup>13</sup>C {<sup>1</sup>H} NMR spectrum of **2** in C<sub>6</sub>D<sub>6</sub> (298 K).

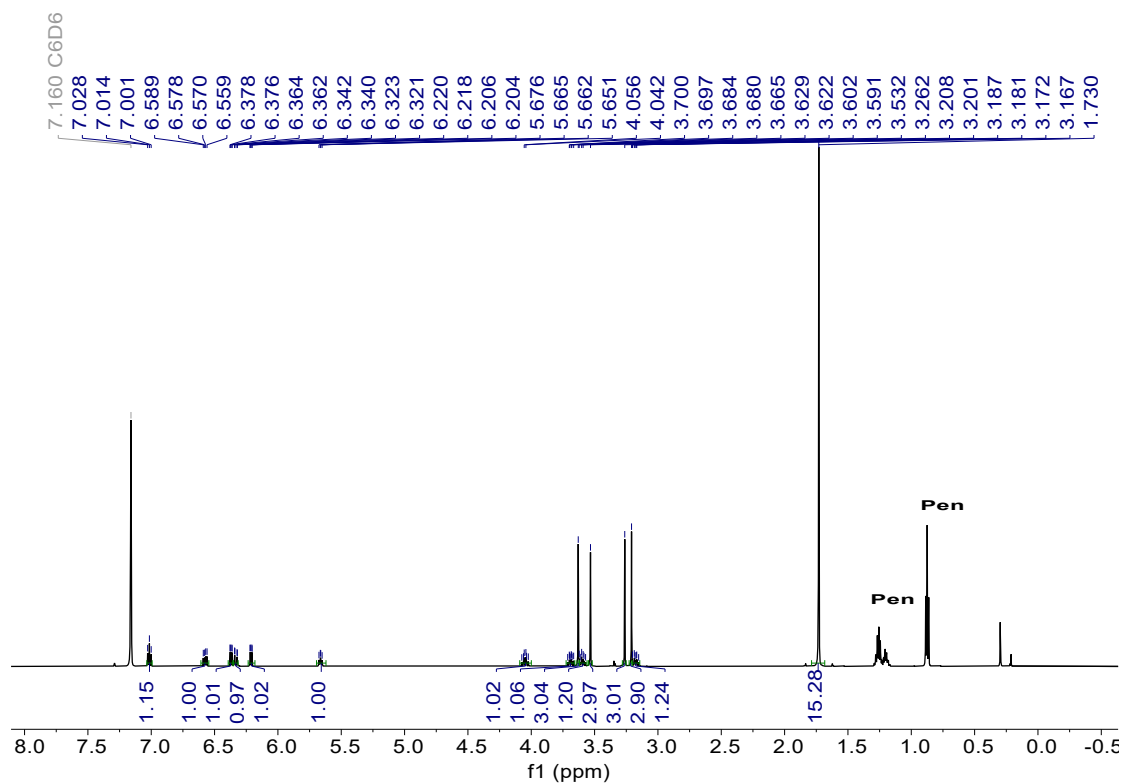

Figure S5.  $^1\text{H}$  NMR spectrum of **3** in  $\text{C}_6\text{D}_6$  (298 K).

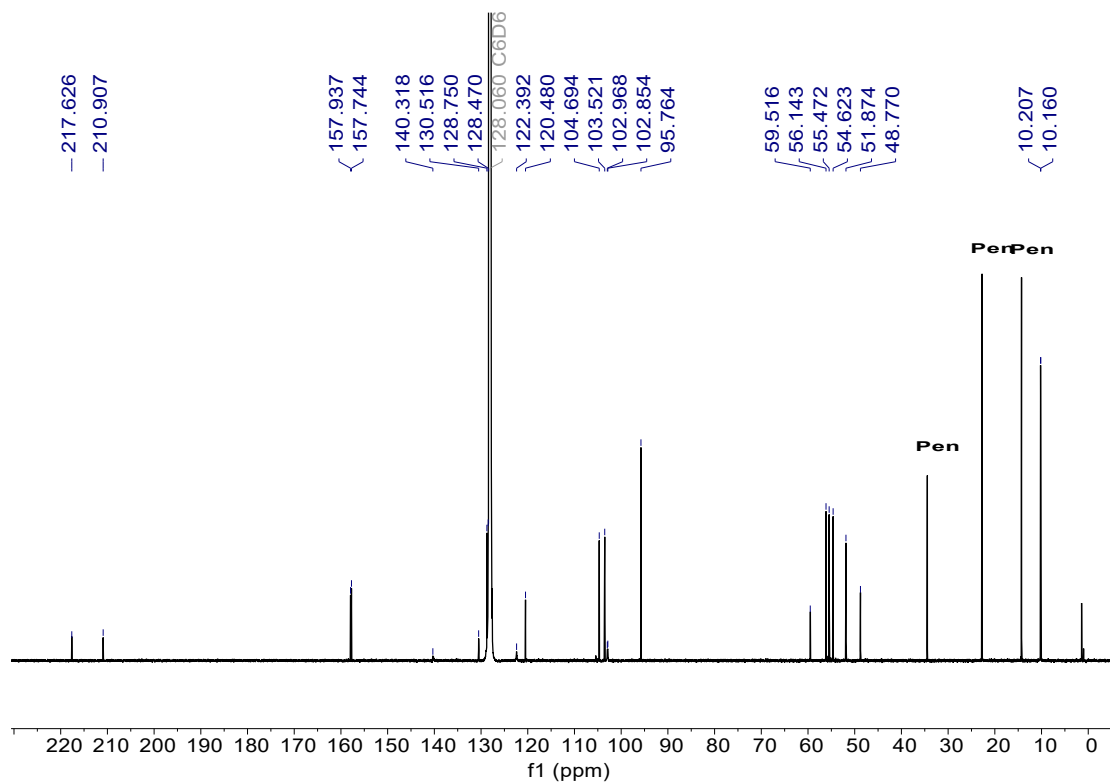

Figure S6.  $^{13}\text{C}\{^1\text{H}\}$  NMR spectrum of **3** in  $\text{C}_6\text{D}_6$  (298 K).

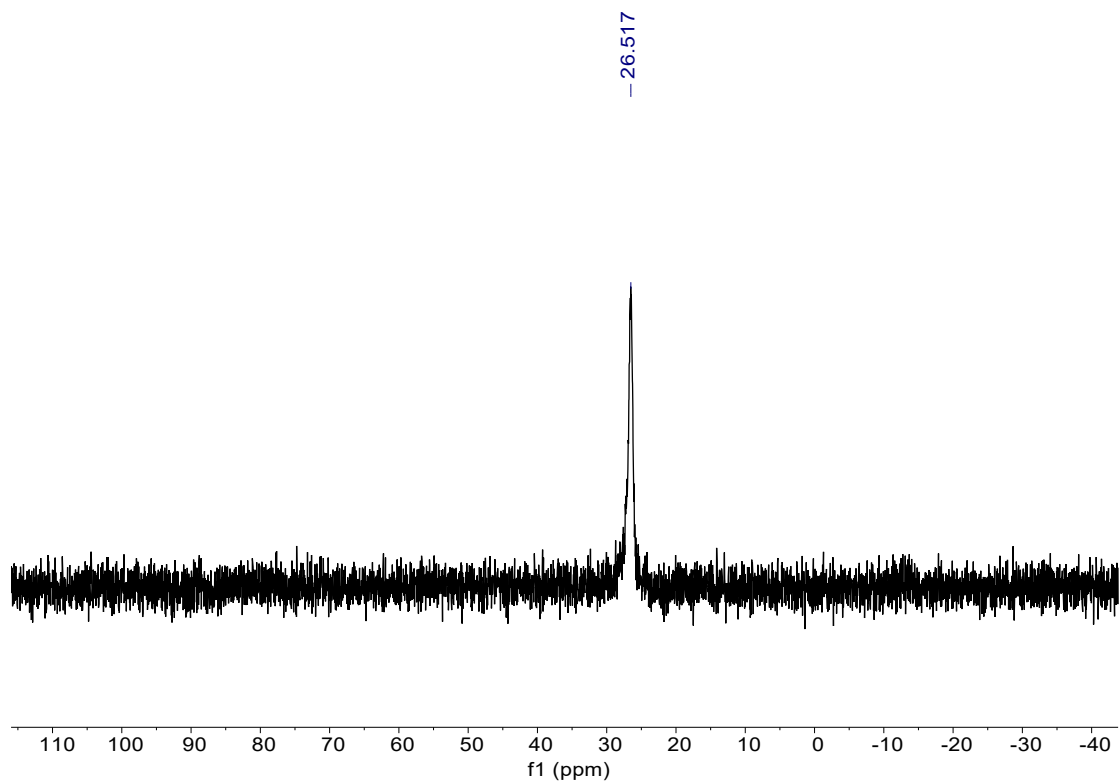

**Figure S7.**  $^{31}\text{P}\{^1\text{H}\}$  NMR spectrum of **3** in  $\text{C}_6\text{D}_6$  (298 K).

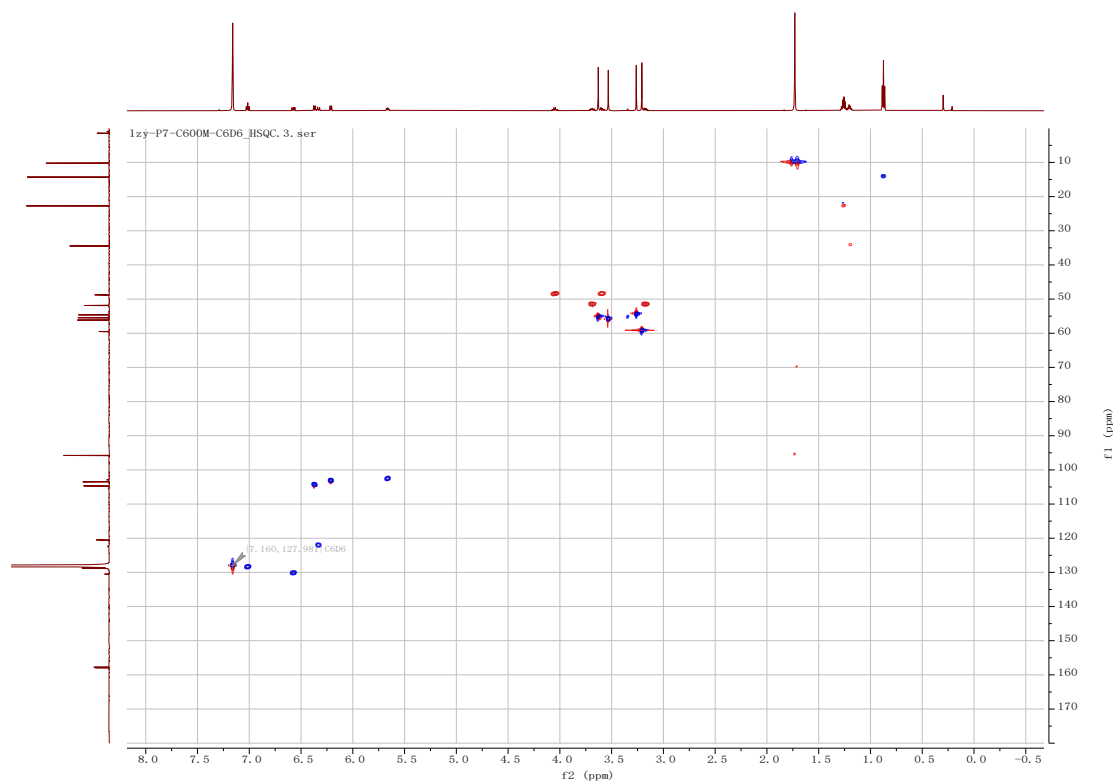

**Figure S8.**  $^1\text{H}$ - $^{13}\text{C}$  HSQC spectrum of **3** in  $\text{C}_6\text{D}_6$  (298 K).

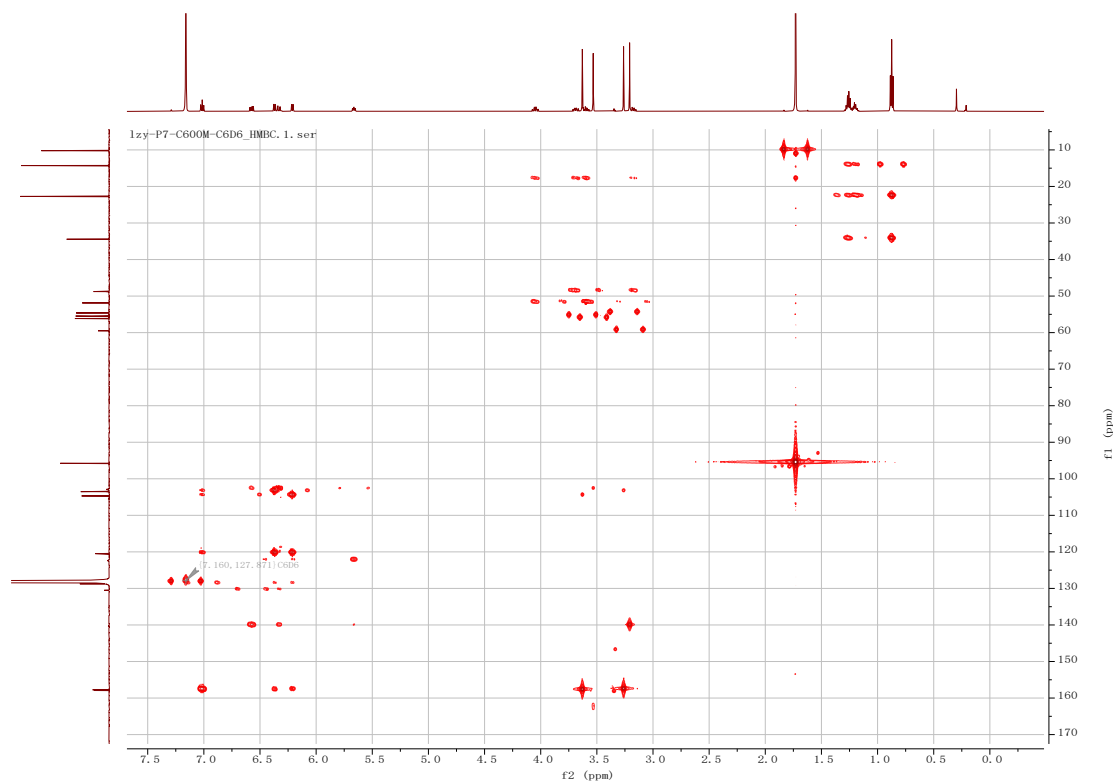

**Figure S9.**  $^1\text{H}$ - $^{13}\text{C}$  HMBC spectrum of **3** in  $\text{C}_6\text{D}_6$  (298 K).

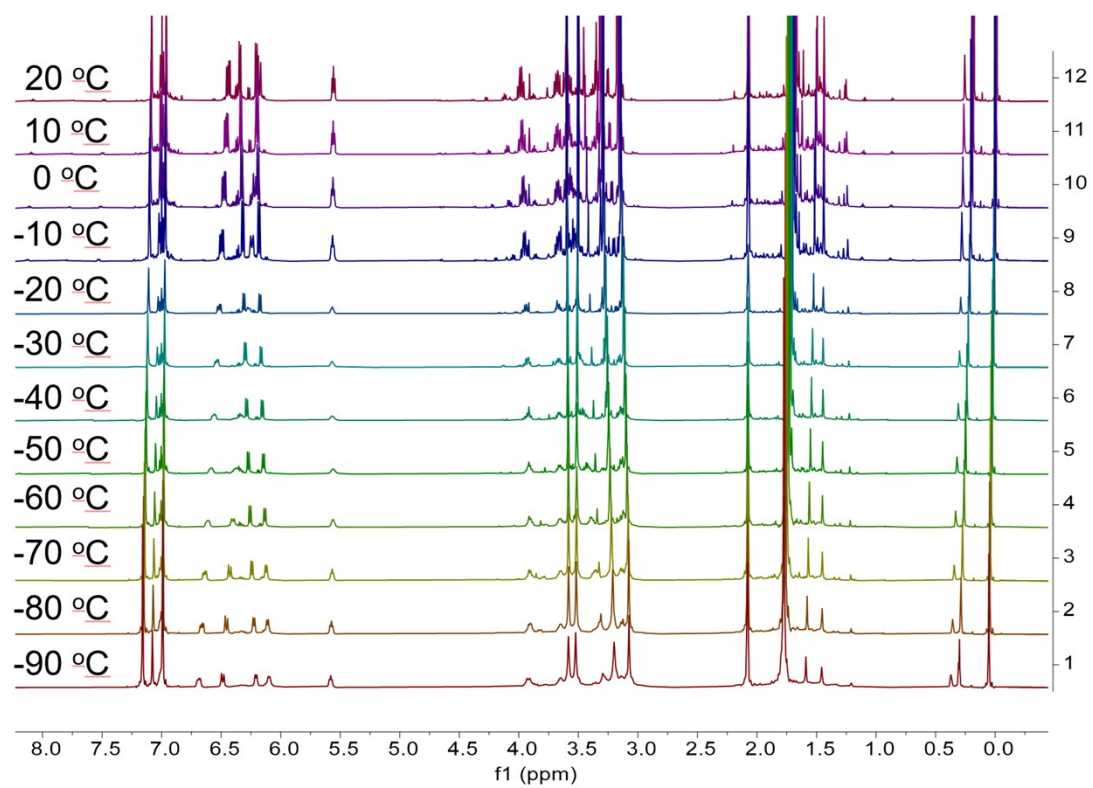

**Figure S10.**  $^1\text{H}$  NMR spectrum of **3** in toluene- $\text{d}_8$  (from  $-90\text{ }^\circ\text{C}$  to  $20\text{ }^\circ\text{C}$ ).

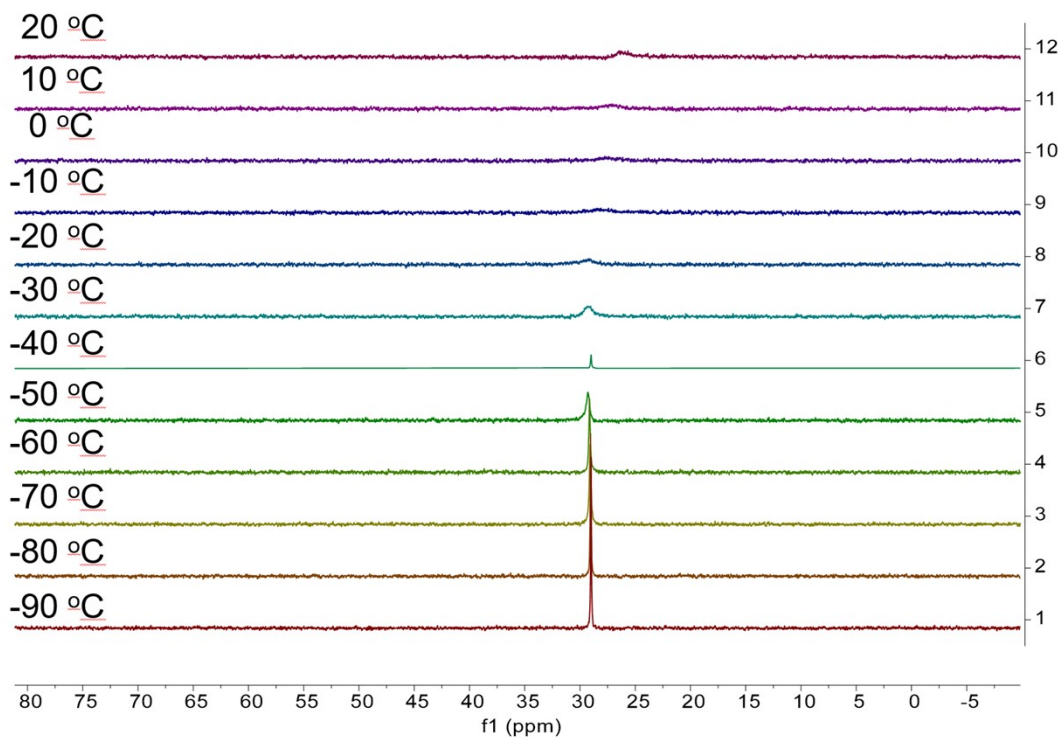

**Figure S11.**  $^{31}\text{P}\{^1\text{H}\}$  NMR spectrum of **3** in toluene- $d_8$  (from -90 °C to 20 °C).

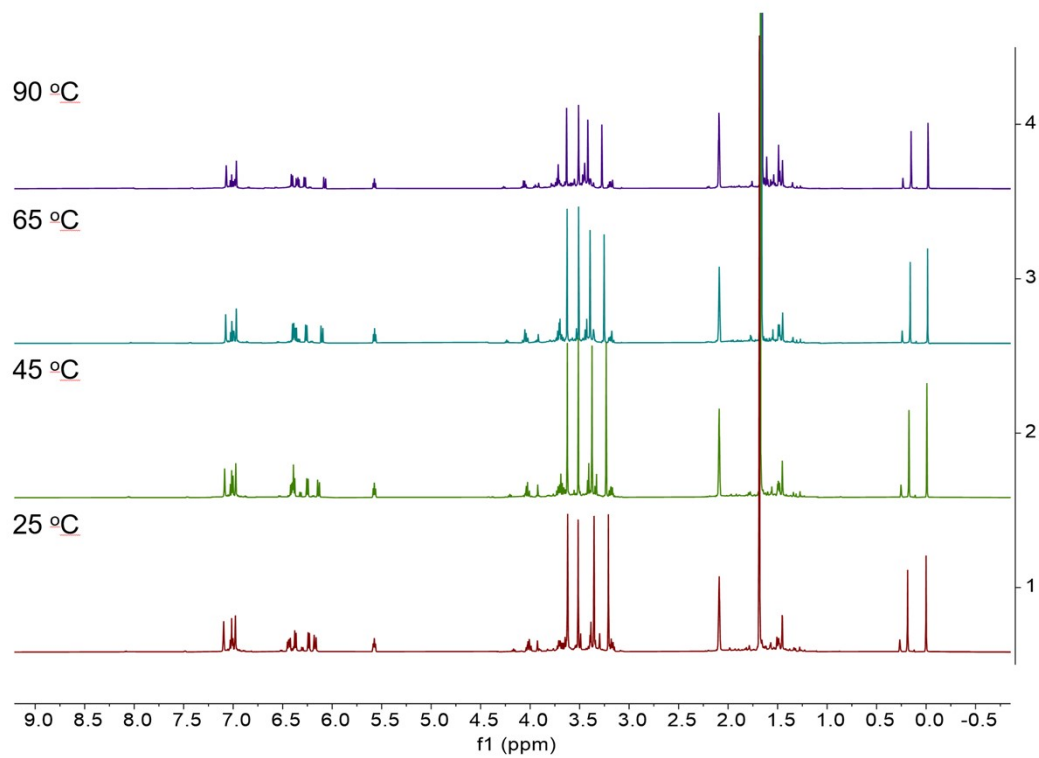

**Figure S12.**  $^1\text{H}$  NMR spectrum of **3** in toluene- $d_8$  (from 20 °C to 90 °C).

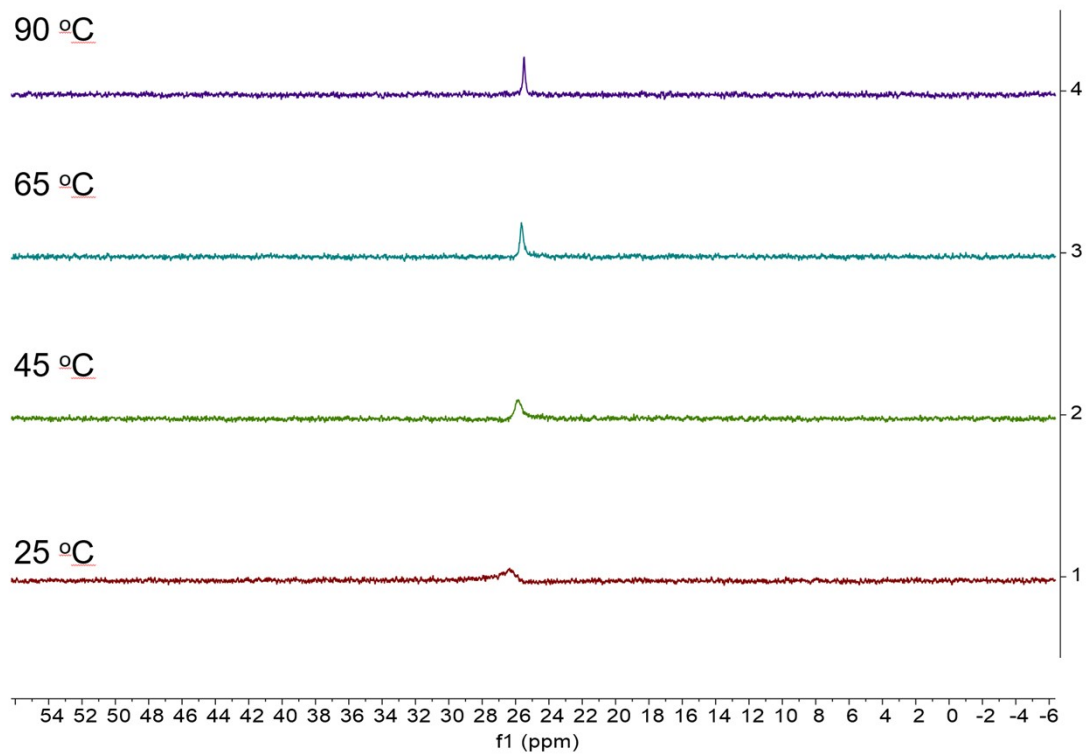

**Figure S13.**  $^{31}\text{P}\{^1\text{H}\}$  NMR spectrum of **3** in toluene- $d_8$  (from 20 °C to 90 °C).

## Details of Computational Results

**Computational details.** All density functional theory (DFT) calculations were performed using Orca 5.0.3 program.<sup>2-6</sup> Geometry optimizations of all structures were carried out using the PBE0 functional with the D4 empirical dispersion correction to account for van der Waals interactions.<sup>7-11</sup> The ZORA-def2-SVP basis set was used for C, H, N, O, and ZORA-def2-TZVP basis set for P, and SARC-ZORA-TZVP basis set for Ru.<sup>12, 13</sup> The ZORA Hamiltonian was employed to account for scalar relativistic effects for all atoms.<sup>14</sup> The resolution-of-identity (RI) approximation was employed to accelerate the calculations. For the RI-J approximation, the automatically generated AutoAux auxiliary basis sets were used for light atoms (C, H, N, O, P).<sup>15, 16</sup> For the ruthenium atom, the SARC/J auxiliary basis set was employed in conjunction with the SARC-ZORA-TZVP primary basis set.<sup>13, 17-19</sup> The solvation effects in benzene were evaluated using the conductor-like polarizable continuum model (CPCM) with a self-consistent reaction field (SCRF).<sup>20, 21</sup> The molecular cavity was defined using the United Atom Topological Model (UFF) atomic radii. Frequency analysis was performed at the same level of theory as geometry optimization to confirm whether optimized stationary points were either local minimum or transition state, as well as to evaluate zero-point vibrational energies and thermal corrections for enthalpies and free energies at 298.15 K. Single-point energies were computed on the optimized structures using the PBE0-D4 functional and the larger ZORA-def2-TZVPP basis set for C, H, O, N, P and SARC-ZORA-TZVPP for Ru.<sup>12, 22, 23</sup> The resolution-of-identity (RI) approximation was employed with the matching def2-TZVPP/C and SARC/J auxiliary basis sets.<sup>3-5, 24</sup> All other settings (ZORA, CPCM(benzene)) remained unchanged. The electron spin density distribution diagram and orbital diagrams were generated and visualized from Multiwfn and VMD.<sup>25-27</sup>

**Table S2.** Selected orbital composition analysis of ground state of **3** with Mullikenpartition.

| Orbital | 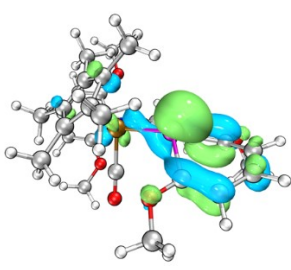 |  |
|---------|-------------------------------------------------------------------------------------|--------------------------------------------------------------------------------------|
|         | HOMO                                                                                | LUMO                                                                                 |
| Ru      | 8.5%                                                                                | 2.5%                                                                                 |
| P       | 29.1%                                                                               | 2.4%                                                                                 |

**Table S3.** Selected orbital composition analysis of triplet state of **3** with Mullikenpartition. (The phenyl group exhibits a notable contribution to the delocalized character of HOMO, LUMO and LUMO+1.)

|         |                                                                                   |                                                                                   |                                                                                    |                                                                                     |
|---------|-----------------------------------------------------------------------------------|-----------------------------------------------------------------------------------|------------------------------------------------------------------------------------|-------------------------------------------------------------------------------------|
| Orbital | 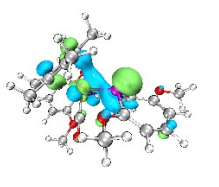 |  |  |  |
|         | SOMO-3                                                                            | SOMO-2                                                                            | SOMO-1                                                                             | SOMO                                                                                |
| P       | 15.1%                                                                             | 24.6%                                                                             | 26.0%                                                                              | 3.9%                                                                                |

**Table S4.** Selected atomic spin densities for triplet state of **3**.

|                                                                                    |      |      |      |     |      |     |      |
|------------------------------------------------------------------------------------|------|------|------|-----|------|-----|------|
| 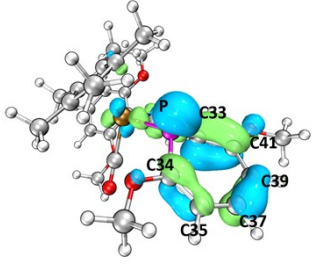 | P    | C33  | C41  | C39 | C37  | C35 | C34  |
| Spin density                                                                       | 0.15 | 0.58 | 0.15 | ~0  | 0.48 | ~0  | 0.40 |

**Table S5.** UNO occupation numbers (HONO and LUNO) and broken-symmetry  $\langle S^2 \rangle$  expectation values for the open-shell singlet intermediates and transition states along the stepwise pathway.

| Transition state /Intermediate | orbital    | occupation | $\langle S^2 \rangle$ |
|--------------------------------|------------|------------|-----------------------|
| TS1                            | HONO (165) | 1.41       | 0.8512                |
|                                | LUNO (166) | 0.59       |                       |
| IM2                            | HONO (165) | 1.21       | 0.9693                |
|                                | LUNO (166) | 0.79       |                       |
| TS2                            | HONO (165) | 1.09       | 1.0310                |
|                                | LUNO (166) | 0.91       |                       |
| IM3                            | HONO (165) | 1.03       | 1.0444                |
|                                | LUNO (166) | 0.97       |                       |
| TS3                            | HONO (165) | 1.51       | 1.0406                |
|                                | LUNO (166) | 0.49       |                       |

#### Coordinates for calculated structures

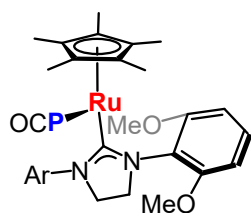

### IM1

Gibbs free energy = -6571.7839043733

Electronic energy = -6572.3448591033

Imaginary frequency = NO

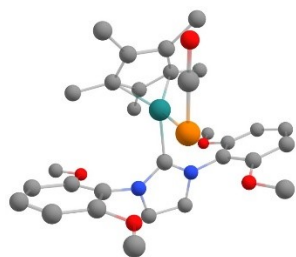

$\text{RuC}_{30}\text{PN}_2\text{H}_{37}\text{O}_5$

|    |              |              |             |
|----|--------------|--------------|-------------|
| Ru | 1.363865000  | -4.867096000 | 5.520377000 |
| P  | -0.903732000 | -5.139331000 | 4.781405000 |
| N  | 2.273162000  | -4.318747000 | 2.657622000 |
| N  | 2.504982000  | -6.412558000 | 3.148793000 |
| C  | 2.680742000  | -5.633165000 | 7.012462000 |
| C  | 3.227713000  | -7.006864000 | 7.199230000 |
| C  | 1.495055000  | -5.127992000 | 7.682524000 |
| C  | 0.622370000  | -5.946130000 | 8.573770000 |
| C  | 1.384954000  | -3.745219000 | 7.394887000 |
| C  | 0.378353000  | -2.778140000 | 7.922220000 |
| C  | 2.496287000  | -3.377952000 | 6.535681000 |
| C  | 2.813482000  | -1.979679000 | 6.129663000 |
| C  | 3.328888000  | -4.534313000 | 6.355506000 |
| C  | 4.632744000  | -4.583861000 | 5.630730000 |
| C  | 2.042226000  | -5.233893000 | 3.625611000 |
| C  | 1.867907000  | -2.972163000 | 2.672697000 |
| C  | 0.530488000  | -2.641940000 | 2.383749000 |
| C  | 0.126506000  | -1.300767000 | 2.393671000 |
| H  | -0.910233000 | -1.031054000 | 2.213931000 |
| C  | 1.078075000  | -0.307356000 | 2.606201000 |
| H  | 0.764059000  | 0.735650000  | 2.605812000 |
| C  | 2.423629000  | -0.609525000 | 2.797552000 |
| H  | 3.146408000  | 0.189044000  | 2.938645000 |

|   |              |               |             |
|---|--------------|---------------|-------------|
| C | 2.819372000  | -1.951477000  | 2.822676000 |
| C | -1.630612000 | -3.418944000  | 1.819042000 |
| H | -2.087234000 | -4.388340000  | 1.606610000 |
| H | -2.129525000 | -2.981100000  | 2.693765000 |
| H | -1.756400000 | -2.758016000  | 0.949560000 |
| C | 5.114200000  | -1.388440000  | 3.037472000 |
| H | 6.057363000  | -1.933916000  | 3.122419000 |
| H | 5.131257000  | -0.776872000  | 2.124755000 |
| H | 5.004863000  | -0.728635000  | 3.909803000 |
| C | 2.341275000  | -7.674937000  | 3.747065000 |
| C | 1.084463000  | -8.307927000  | 3.719317000 |
| C | 0.928196000  | -9.573170000  | 4.300575000 |
| H | -0.043487000 | -10.058126000 | 4.322650000 |
| C | 2.043867000  | -10.223324000 | 4.820523000 |
| H | 1.923289000  | -11.211951000 | 5.261627000 |
| C | 3.313100000  | -9.653213000  | 4.772978000 |
| H | 4.168397000  | -10.193690000 | 5.168375000 |
| C | 3.459964000  | -8.372513000  | 4.228438000 |
| C | -1.183483000 | -8.192136000  | 3.060121000 |
| H | -1.807857000 | -7.482501000  | 2.512844000 |
| H | -1.194287000 | -9.163270000  | 2.544769000 |
| H | -1.590277000 | -8.306015000  | 4.073511000 |
| C | 5.814940000  | -8.391361000  | 4.524592000 |
| H | 6.641471000  | -7.705472000  | 4.322393000 |
| H | 5.804188000  | -8.630693000  | 5.597467000 |
| H | 5.964611000  | -9.316902000  | 3.951604000 |
| H | 3.658351000  | -7.110005000  | 8.206593000 |
| H | 4.015583000  | -7.218452000  | 6.473809000 |
| H | 2.451904000  | -7.772500000  | 7.088734000 |
| H | 4.656205000  | -3.847764000  | 4.820578000 |
| H | 4.790318000  | -5.570276000  | 5.182587000 |
| H | 5.471338000  | -4.374836000  | 6.310864000 |
| H | 3.200501000  | -1.412212000  | 6.989423000 |
| H | 1.927714000  | -1.454744000  | 5.755873000 |
| H | 3.572381000  | -1.961985000  | 5.345321000 |
| H | 0.113547000  | -2.033761000  | 7.162593000 |
| H | 0.784532000  | -2.237299000  | 8.789464000 |
| H | -0.543097000 | -3.274878000  | 8.237890000 |
| H | -0.371088000 | -5.504145000  | 8.690317000 |

|   |              |              |             |
|---|--------------|--------------|-------------|
| H | 1.071472000  | -6.037593000 | 9.573535000 |
| H | 0.493154000  | -6.959133000 | 8.175368000 |
| C | -1.629345000 | -4.898974000 | 6.245698000 |
| O | -2.201815000 | -4.741485000 | 7.256983000 |
| O | 4.639546000  | -7.726471000 | 4.129719000 |
| O | 0.111324000  | -7.642928000 | 3.086861000 |
| O | -0.270695000 | -3.669093000 | 2.077986000 |
| O | 4.095223000  | -2.357487000 | 2.987446000 |
| C | 3.013453000  | -6.346033000 | 1.779503000 |
| H | 2.379352000  | -6.951388000 | 1.117775000 |
| H | 4.037060000  | -6.735954000 | 1.733929000 |
| C | 2.930291000  | -4.854684000 | 1.467086000 |
| H | 3.916248000  | -4.389843000 | 1.339769000 |
| H | 2.327989000  | -4.642610000 | 0.575171000 |

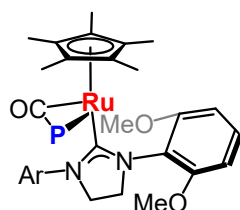

### TS1

Gibbs free energy = -6571.7575504467

Electronic energy = -6572.3183112167

Imaginary frequency = -299.5

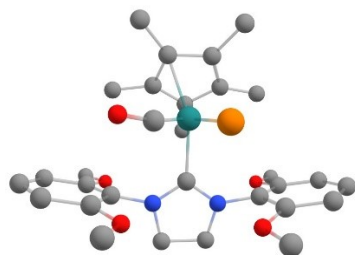

### RuC<sub>30</sub>PN<sub>2</sub>H<sub>37</sub>O<sub>5</sub>

|    |              |              |              |
|----|--------------|--------------|--------------|
| Ru | -0.647029000 | -0.064714000 | 1.161973000  |
| P  | -2.307003000 | -1.584794000 | 1.125060000  |
| N  | -0.159348000 | 0.907351000  | -1.699012000 |
| N  | 0.483189000  | -1.143430000 | -1.464790000 |
| C  | 0.046523000  | -0.422418000 | 3.279845000  |
| C  | -0.514401000 | -1.417090000 | 4.241039000  |
| C  | -0.383278000 | 0.941755000  | 3.120531000  |
| C  | -1.475056000 | 1.615035000  | 3.887661000  |

|   |              |              |              |
|---|--------------|--------------|--------------|
| C | 0.508237000  | 1.593370000  | 2.202776000  |
| C | 0.525558000  | 3.056534000  | 1.908236000  |
| C | 1.450503000  | 0.608492000  | 1.762955000  |
| C | 2.589746000  | 0.862240000  | 0.828103000  |
| C | 1.198319000  | -0.623880000 | 2.460043000  |
| C | 2.043845000  | -1.853126000 | 2.454919000  |
| C | -0.128931000 | -0.121634000 | -0.830843000 |
| C | -0.844246000 | 2.126618000  | -1.545788000 |
| C | -2.240767000 | 2.154990000  | -1.701530000 |
| C | -2.926431000 | 3.371302000  | -1.604907000 |
| H | -4.009520000 | 3.405795000  | -1.678548000 |
| C | -2.200113000 | 4.543010000  | -1.416841000 |
| H | -2.733537000 | 5.489648000  | -1.340712000 |
| C | -0.808749000 | 4.543532000  | -1.339247000 |
| H | -0.270453000 | 5.478977000  | -1.215559000 |
| C | -0.126623000 | 3.325161000  | -1.421783000 |
| C | -4.217805000 | 0.899540000  | -2.053926000 |
| H | -4.457189000 | -0.150898000 | -2.236474000 |
| H | -4.692362000 | 1.217400000  | -1.117608000 |
| H | -4.592472000 | 1.507814000  | -2.889258000 |
| C | 2.000061000  | 4.374795000  | -1.391521000 |
| H | 3.042911000  | 4.049767000  | -1.428537000 |
| H | 1.786255000  | 5.007991000  | -2.263594000 |
| H | 1.841206000  | 4.959861000  | -0.474670000 |
| C | 0.583540000  | -2.479535000 | -1.034116000 |
| C | -0.539587000 | -3.320793000 | -1.135292000 |
| C | -0.442508000 | -4.662322000 | -0.748360000 |
| H | -1.310680000 | -5.314461000 | -0.779251000 |
| C | 0.791805000  | -5.161289000 | -0.341430000 |
| H | 0.868394000  | -6.206298000 | -0.044002000 |
| C | 1.936385000  | -4.368390000 | -0.329179000 |
| H | 2.891753000  | -4.795467000 | -0.037880000 |
| C | 1.831647000  | -3.021611000 | -0.695555000 |
| C | -2.815576000 | -3.523689000 | -1.755942000 |
| H | -3.575076000 | -2.863343000 | -2.181012000 |
| H | -2.667516000 | -4.385990000 | -2.421361000 |
| H | -3.160160000 | -3.870309000 | -0.772298000 |
| C | 4.177902000  | -2.687379000 | -0.583087000 |
| H | 4.864929000  | -1.852189000 | -0.741281000 |

|   |              |              |              |
|---|--------------|--------------|--------------|
| H | 4.321929000  | -3.078570000 | 0.433940000  |
| H | 4.400052000  | -3.482330000 | -1.308321000 |
| H | 0.013806000  | -1.364426000 | 5.204180000  |
| H | -0.415886000 | -2.438276000 | 3.857459000  |
| H | -1.578056000 | -1.238828000 | 4.429919000  |
| H | 2.749728000  | -1.837178000 | 1.622159000  |
| H | 1.441508000  | -2.764816000 | 2.366655000  |
| H | 2.626028000  | -1.929314000 | 3.385580000  |
| H | 3.476714000  | 1.203079000  | 1.381263000  |
| H | 2.326892000  | 1.631401000  | 0.094838000  |
| H | 2.857239000  | -0.046094000 | 0.279533000  |
| H | 1.108502000  | 3.265898000  | 1.008922000  |
| H | 0.978431000  | 3.618429000  | 2.739173000  |
| H | -0.483378000 | 3.453415000  | 1.750144000  |
| H | -1.955258000 | 2.400793000  | 3.294575000  |
| H | -1.077118000 | 2.080568000  | 4.800605000  |
| H | -2.252090000 | 0.903709000  | 4.186431000  |
| C | -2.407472000 | 0.526272000  | 0.912068000  |
| O | -3.353257000 | 1.227079000  | 0.935046000  |
| O | 2.879779000  | -2.175577000 | -0.765795000 |
| O | -1.641668000 | -2.755777000 | -1.644563000 |
| O | -2.815248000 | 0.972610000  | -1.955494000 |
| O | 1.217044000  | 3.205751000  | -1.402637000 |
| C | 0.904879000  | -0.829367000 | -2.830300000 |
| H | 0.453788000  | -1.540007000 | -3.533281000 |
| H | 1.996301000  | -0.905784000 | -2.909192000 |
| C | 0.389403000  | 0.592931000  | -3.017768000 |
| H | 1.179021000  | 1.307829000  | -3.275373000 |
| H | -0.403937000 | 0.659831000  | -3.773722000 |

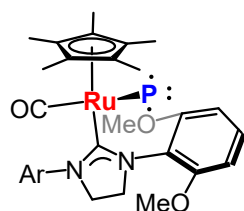

**OSS**

## IM2

Gibbs free energy = -6571.7771396502

Electronic energy = -6572.3378604602

Imaginary frequency = NO

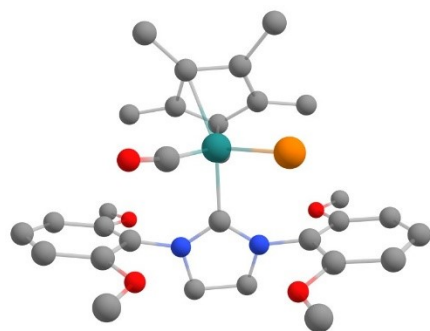

$\text{RuC}_{30}\text{PN}_2\text{H}_{37}\text{O}_5$

|    |              |              |              |
|----|--------------|--------------|--------------|
| Ru | -0.617011000 | -0.088114000 | 1.210834000  |
| P  | -1.545764000 | -2.172652000 | 1.324647000  |
| N  | -0.177947000 | 0.874904000  | -1.644434000 |
| N  | 0.558152000  | -1.145814000 | -1.425236000 |
| C  | 0.095675000  | -0.327442000 | 3.351973000  |
| C  | -0.410789000 | -1.272307000 | 4.388546000  |
| C  | -0.330694000 | 1.020391000  | 3.144534000  |
| C  | -1.398605000 | 1.738117000  | 3.905302000  |
| C  | 0.546239000  | 1.629979000  | 2.182405000  |
| C  | 0.569609000  | 3.084852000  | 1.850790000  |
| C  | 1.489215000  | 0.634433000  | 1.770509000  |
| C  | 2.617555000  | 0.850073000  | 0.814334000  |
| C  | 1.225282000  | -0.571839000 | 2.496462000  |
| C  | 2.040025000  | -1.821121000 | 2.515247000  |
| C  | -0.113709000 | -0.164400000 | -0.782673000 |
| C  | -0.891743000 | 2.077551000  | -1.495758000 |
| C  | -2.288867000 | 2.079249000  | -1.656122000 |
| C  | -2.998510000 | 3.282502000  | -1.564920000 |
| H  | -4.082006000 | 3.295924000  | -1.639921000 |
| C  | -2.295423000 | 4.470835000  | -1.390842000 |
| H  | -2.847429000 | 5.407234000  | -1.321049000 |
| C  | -0.904163000 | 4.499761000  | -1.326520000 |
| H  | -0.383116000 | 5.447235000  | -1.221837000 |
| C  | -0.198567000 | 3.294039000  | -1.400044000 |
| C  | -4.240010000 | 0.799657000  | -2.052695000 |
| H  | -4.463943000 | -0.251370000 | -2.249849000 |
| H  | -4.750213000 | 1.106805000  | -1.131527000 |
| H  | -4.594678000 | 1.409340000  | -2.895608000 |
| C  | 1.905994000  | 4.389032000  | -1.430569000 |
| H  | 2.954265000  | 4.084350000  | -1.482726000 |

|   |              |              |              |
|---|--------------|--------------|--------------|
| H | 1.661814000  | 5.000767000  | -2.309888000 |
| H | 1.753703000  | 4.988209000  | -0.521823000 |
| C | 0.616064000  | -2.508886000 | -1.081637000 |
| C | -0.516436000 | -3.309700000 | -1.320190000 |
| C | -0.472674000 | -4.679938000 | -1.035181000 |
| H | -1.350973000 | -5.304622000 | -1.169744000 |
| C | 0.717057000  | -5.234409000 | -0.575094000 |
| H | 0.751406000  | -6.298891000 | -0.346993000 |
| C | 1.873147000  | -4.472362000 | -0.418451000 |
| H | 2.794531000  | -4.944037000 | -0.088965000 |
| C | 1.826459000  | -3.101973000 | -0.697623000 |
| C | -2.796512000 | -3.349517000 | -1.947013000 |
| H | -3.512306000 | -2.632227000 | -2.355869000 |
| H | -2.741710000 | -4.222037000 | -2.613372000 |
| H | -3.132068000 | -3.660968000 | -0.948026000 |
| C | 4.163753000  | -2.839514000 | -0.395441000 |
| H | 4.879987000  | -2.015342000 | -0.446498000 |
| H | 4.220587000  | -3.299245000 | 0.601357000  |
| H | 4.422664000  | -3.592495000 | -1.152723000 |
| H | 0.243466000  | -1.254269000 | 5.272259000  |
| H | -0.441899000 | -2.298858000 | 4.004697000  |
| H | -1.423239000 | -1.010588000 | 4.712775000  |
| H | 2.761000000  | -1.826741000 | 1.695760000  |
| H | 1.405396000  | -2.711261000 | 2.413230000  |
| H | 2.595271000  | -1.911030000 | 3.460185000  |
| H | 3.509714000  | 1.212383000  | 1.344890000  |
| H | 2.348876000  | 1.590071000  | 0.053348000  |
| H | 2.878599000  | -0.081432000 | 0.302786000  |
| H | 1.151694000  | 3.268883000  | 0.946396000  |
| H | 1.028980000  | 3.660325000  | 2.668656000  |
| H | -0.436899000 | 3.485817000  | 1.688976000  |
| H | -1.884366000 | 2.502352000  | 3.288943000  |
| H | -0.973282000 | 2.242298000  | 4.784784000  |
| H | -2.174119000 | 1.050536000  | 4.258015000  |
| C | -2.322513000 | 0.517479000  | 0.955036000  |
| O | -3.410383000 | 0.922920000  | 0.952830000  |
| O | 2.895720000  | -2.281655000 | -0.641123000 |
| O | -1.563296000 | -2.677934000 | -1.869136000 |
| O | -2.842532000 | 0.886356000  | -1.909637000 |

|   |              |              |              |
|---|--------------|--------------|--------------|
| O | 1.147122000  | 3.204056000  | -1.403364000 |
| C | 1.008600000  | -0.778521000 | -2.768342000 |
| H | 0.653379000  | -1.515772000 | -3.497343000 |
| H | 2.105517000  | -0.759430000 | -2.800161000 |
| C | 0.380269000  | 0.592668000  | -2.965949000 |
| H | 1.108185000  | 1.364219000  | -3.239155000 |
| H | -0.424826000 | 0.588203000  | -3.713282000 |

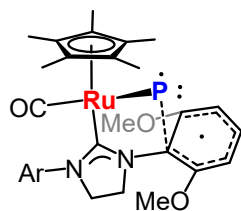

**OSS**

## TS2

Gibbs free energy = -6571.7607172715

Electronic energy = -6572.3207949115

Imaginary frequency = -377.5

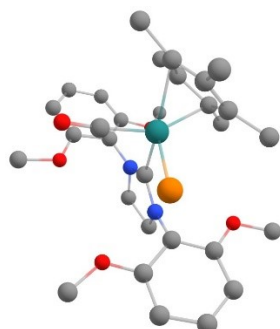

$\text{RuC}_{30}\text{PN}_2\text{H}_{37}\text{O}_5$

|    |              |              |              |
|----|--------------|--------------|--------------|
| Ru | -0.481152000 | -0.136534000 | 1.309616000  |
| P  | -0.652311000 | -2.403165000 | 1.236730000  |
| N  | -0.104929000 | 0.840324000  | -1.554352000 |
| N  | 0.300467000  | -1.280583000 | -1.393396000 |
| C  | 0.138710000  | -0.124483000 | 3.469740000  |
| C  | -0.343190000 | -1.053195000 | 4.534789000  |
| C  | -0.401459000 | 1.159498000  | 3.139983000  |
| C  | -1.575593000 | 1.816195000  | 3.792625000  |
| C  | 0.453561000  | 1.781403000  | 2.170487000  |
| C  | 0.382203000  | 3.213789000  | 1.758744000  |
| C  | 1.511093000  | 0.855070000  | 1.876571000  |
| C  | 2.649689000  | 1.097509000  | 0.939196000  |
| C  | 1.338490000  | -0.302990000 | 2.692076000  |

|   |              |              |              |
|---|--------------|--------------|--------------|
| C | 2.280823000  | -1.450909000 | 2.830614000  |
| C | -0.115890000 | -0.209020000 | -0.696464000 |
| C | -0.756897000 | 2.076437000  | -1.386604000 |
| C | -2.163398000 | 2.127794000  | -1.413674000 |
| C | -2.819925000 | 3.361043000  | -1.320697000 |
| H | -3.904861000 | 3.413235000  | -1.299403000 |
| C | -2.063209000 | 4.530002000  | -1.297163000 |
| H | -2.573616000 | 5.490345000  | -1.236570000 |
| C | -0.673664000 | 4.505118000  | -1.374265000 |
| H | -0.111768000 | 5.434733000  | -1.380903000 |
| C | -0.019455000 | 3.268798000  | -1.429075000 |
| C | -4.185138000 | 0.922076000  | -1.672848000 |
| H | -4.459892000 | -0.124664000 | -1.822283000 |
| H | -4.659404000 | 1.280833000  | -0.751124000 |
| H | -4.535010000 | 1.517690000  | -2.527735000 |
| C | 2.119116000  | 4.277390000  | -1.640468000 |
| H | 3.149601000  | 3.926861000  | -1.738675000 |
| H | 1.852258000  | 4.868492000  | -2.527417000 |
| H | 2.042282000  | 4.913954000  | -0.747621000 |
| C | 0.363764000  | -2.644142000 | -1.005181000 |
| C | -0.641483000 | -3.510461000 | -1.542191000 |
| C | -0.466860000 | -4.887093000 | -1.526924000 |
| H | -1.265614000 | -5.552498000 | -1.843637000 |
| C | 0.754654000  | -5.418869000 | -1.093803000 |
| H | 0.889799000  | -6.498861000 | -1.075101000 |
| C | 1.819861000  | -4.588455000 | -0.730831000 |
| H | 2.773210000  | -5.027582000 | -0.449051000 |
| C | 1.649336000  | -3.208341000 | -0.749313000 |
| C | -2.868814000 | -3.641532000 | -2.326033000 |
| H | -3.657505000 | -2.934395000 | -2.595582000 |
| H | -2.649280000 | -4.282783000 | -3.191906000 |
| H | -3.217605000 | -4.268557000 | -1.493558000 |
| C | 3.913967000  | -2.783679000 | -0.222919000 |
| H | 4.545582000  | -1.903679000 | -0.073427000 |
| H | 3.950618000  | -3.406636000 | 0.682199000  |
| H | 4.300550000  | -3.365364000 | -1.072151000 |
| H | 0.225572000  | -0.912873000 | 5.465565000  |
| H | -0.231864000 | -2.099621000 | 4.226001000  |
| H | -1.401609000 | -0.886941000 | 4.761241000  |

|   |              |              |              |
|---|--------------|--------------|--------------|
| H | 3.022443000  | -1.449199000 | 2.028449000  |
| H | 1.750704000  | -2.412180000 | 2.794682000  |
| H | 2.814820000  | -1.395158000 | 3.789888000  |
| H | 3.491051000  | 1.578040000  | 1.458693000  |
| H | 2.343824000  | 1.743007000  | 0.110085000  |
| H | 3.007365000  | 0.155375000  | 0.511160000  |
| H | 1.035214000  | 3.406384000  | 0.905476000  |
| H | 0.712027000  | 3.866279000  | 2.581412000  |
| H | -0.631915000 | 3.519131000  | 1.480131000  |
| H | -2.081071000 | 2.502940000  | 3.105000000  |
| H | -1.254419000 | 2.397389000  | 4.668631000  |
| H | -2.311175000 | 1.080121000  | 4.133029000  |
| C | -2.302799000 | -0.050902000 | 1.117948000  |
| O | -3.462255000 | 0.001272000  | 1.132146000  |
| O | 2.616328000  | -2.309393000 | -0.473370000 |
| O | -1.753168000 | -2.874309000 | -1.952792000 |
| O | -2.781900000 | 0.951317000  | -1.572741000 |
| O | 1.317113000  | 3.127045000  | -1.528462000 |
| C | 0.703574000  | -0.973710000 | -2.763487000 |
| H | 0.216589000  | -1.658412000 | -3.466788000 |
| H | 1.791623000  | -1.090561000 | -2.858205000 |
| C | 0.246333000  | 0.467686000  | -2.925169000 |
| H | 1.028208000  | 1.129837000  | -3.312979000 |
| H | -0.640643000 | 0.556318000  | -3.567669000 |

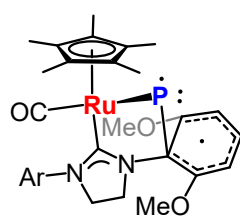

**OSS**

### IM3

Gibbs free energy = -6571.7786008047

Electronic energy = -6572.33798601467

Imaginary frequency = NO

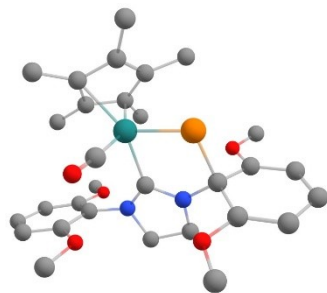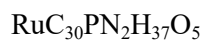

|    |              |              |              |
|----|--------------|--------------|--------------|
| Ru | -0.444222000 | -0.177390000 | 1.330011000  |
| P  | -0.288721000 | -2.459292000 | 1.118900000  |
| N  | -0.059102000 | 0.809041000  | -1.564420000 |
| N  | 0.238261000  | -1.322696000 | -1.321243000 |
| C  | 0.081815000  | -0.117802000 | 3.506443000  |
| C  | -0.394714000 | -1.067505000 | 4.556823000  |
| C  | -0.521199000 | 1.130099000  | 3.137269000  |
| C  | -1.758977000 | 1.719245000  | 3.734006000  |
| C  | 0.329080000  | 1.789794000  | 2.189207000  |
| C  | 0.184148000  | 3.204847000  | 1.736359000  |
| C  | 1.458095000  | 0.929087000  | 1.956614000  |
| C  | 2.620102000  | 1.232215000  | 1.067147000  |
| C  | 1.323709000  | -0.223994000 | 2.784638000  |
| C  | 2.336283000  | -1.303983000 | 2.970243000  |
| C  | -0.099866000 | -0.205109000 | -0.667083000 |
| C  | -0.660413000 | 2.074060000  | -1.428593000 |
| C  | -2.063643000 | 2.179259000  | -1.401397000 |
| C  | -2.669266000 | 3.439946000  | -1.324092000 |
| H  | -3.750032000 | 3.534851000  | -1.267140000 |
| C  | -1.868965000 | 4.578947000  | -1.363004000 |
| H  | -2.340808000 | 5.559575000  | -1.316219000 |
| C  | -0.484460000 | 4.497996000  | -1.479808000 |
| H  | 0.111948000  | 5.404606000  | -1.526110000 |
| C  | 0.120801000  | 3.236016000  | -1.515735000 |
| C  | -4.139211000 | 1.045587000  | -1.531004000 |
| H  | -4.459319000 | 0.006069000  | -1.628991000 |
| H  | -4.561866000 | 1.454280000  | -0.604311000 |
| H  | -4.503569000 | 1.625307000  | -2.390766000 |
| C  | 2.296413000  | 4.158359000  | -1.730678000 |
| H  | 3.313615000  | 3.767909000  | -1.815485000 |
| H  | 2.065178000  | 4.758412000  | -2.621716000 |

|   |              |              |              |
|---|--------------|--------------|--------------|
| H | 2.231880000  | 4.798374000  | -0.839384000 |
| C | 0.276194000  | -2.635965000 | -0.733665000 |
| C | -0.711346000 | -3.550538000 | -1.389886000 |
| C | -0.430631000 | -4.864616000 | -1.673593000 |
| H | -1.206542000 | -5.520034000 | -2.062876000 |
| C | 0.872529000  | -5.374776000 | -1.475044000 |
| H | 1.084441000  | -6.417909000 | -1.697920000 |
| C | 1.914431000  | -4.524121000 | -1.039365000 |
| H | 2.923707000  | -4.920020000 | -0.952684000 |
| C | 1.658714000  | -3.207202000 | -0.746749000 |
| C | -2.969829000 | -3.694644000 | -2.073731000 |
| H | -3.820702000 | -3.013311000 | -2.155156000 |
| H | -2.751263000 | -4.120851000 | -3.063889000 |
| H | -3.225793000 | -4.511048000 | -1.383304000 |
| C | 3.925595000  | -2.688552000 | -0.325560000 |
| H | 4.503782000  | -1.801541000 | -0.052404000 |
| H | 4.074545000  | -3.465026000 | 0.438622000  |
| H | 4.283012000  | -3.069303000 | -1.293569000 |
| H | 0.092940000  | -0.870366000 | 5.522775000  |
| H | -0.177803000 | -2.106246000 | 4.281227000  |
| H | -1.476378000 | -0.985467000 | 4.706521000  |
| H | 2.945331000  | -1.438653000 | 2.072044000  |
| H | 1.859253000  | -2.265887000 | 3.188677000  |
| H | 3.005509000  | -1.058799000 | 3.807493000  |
| H | 3.370229000  | 1.840587000  | 1.592682000  |
| H | 2.301598000  | 1.778165000  | 0.173667000  |
| H | 3.107980000  | 0.309851000  | 0.735236000  |
| H | 0.884872000  | 3.428736000  | 0.928859000  |
| H | 0.401201000  | 3.897692000  | 2.563210000  |
| H | -0.824329000 | 3.427882000  | 1.371201000  |
| H | -2.269791000 | 2.376888000  | 3.022308000  |
| H | -1.511606000 | 2.316796000  | 4.622961000  |
| H | -2.467249000 | 0.943235000  | 4.042654000  |
| C | -2.261777000 | -0.287467000 | 1.098725000  |
| O | -3.418979000 | -0.365594000 | 1.057598000  |
| O | 2.582141000  | -2.289544000 | -0.396537000 |
| O | -1.892034000 | -2.937554000 | -1.590106000 |
| O | -2.733126000 | 1.023720000  | -1.491116000 |
| O | 1.448729000  | 3.040532000  | -1.627912000 |

|   |              |              |              |
|---|--------------|--------------|--------------|
| C | 0.617224000  | -1.112055000 | -2.709008000 |
| H | 0.078937000  | -1.801933000 | -3.370161000 |
| H | 1.695022000  | -1.288584000 | -2.831209000 |
| C | 0.231613000  | 0.347866000  | -2.925348000 |
| H | 1.034932000  | 0.946049000  | -3.369271000 |
| H | -0.668266000 | 0.453498000  | -3.546881000 |

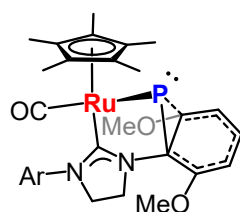

### TS3

Gibbs free energy = -6571.7775483520

Electronic energy = -6572.3372435220

Imaginary frequency = -175.5

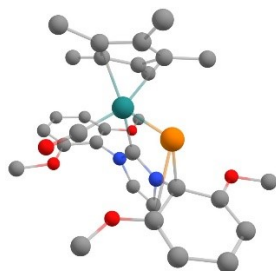

### RuC<sub>30</sub>PN<sub>2</sub>H<sub>37</sub>O<sub>5</sub>

|    |              |              |              |
|----|--------------|--------------|--------------|
| Ru | -0.431228000 | -0.275791000 | 1.163867000  |
| P  | 0.152412000  | -2.501564000 | 1.070939000  |
| N  | 0.114823000  | 0.701496000  | -1.716986000 |
| N  | 0.594989000  | -1.385618000 | -1.394014000 |
| C  | 0.076131000  | -0.246888000 | 3.342631000  |
| C  | -0.005495000 | -1.400874000 | 4.286204000  |
| C  | -0.934810000 | 0.732127000  | 3.094991000  |
| C  | -2.291704000 | 0.772245000  | 3.721485000  |
| C  | -0.386134000 | 1.750907000  | 2.233807000  |
| C  | -1.058359000 | 3.032011000  | 1.866930000  |
| C  | 0.964062000  | 1.381785000  | 1.948212000  |
| C  | 1.966939000  | 2.198174000  | 1.202108000  |
| C  | 1.257423000  | 0.152345000  | 2.614702000  |
| C  | 2.586525000  | -0.525951000 | 2.664550000  |
| C  | 0.121668000  | -0.281169000 | -0.788465000 |
| C  | -0.390548000 | 2.007641000  | -1.589694000 |

|   |              |              |              |
|---|--------------|--------------|--------------|
| C | -1.780204000 | 2.231169000  | -1.545331000 |
| C | -2.275889000 | 3.540881000  | -1.482700000 |
| H | -3.344295000 | 3.726768000  | -1.422364000 |
| C | -1.386721000 | 4.609700000  | -1.521354000 |
| H | -1.775365000 | 5.626077000  | -1.474382000 |
| C | -0.013136000 | 4.412748000  | -1.636404000 |
| H | 0.656597000  | 5.266151000  | -1.690589000 |
| C | 0.483618000  | 3.104491000  | -1.691019000 |
| C | -3.952459000 | 1.295969000  | -1.585883000 |
| H | -4.373608000 | 0.290188000  | -1.636061000 |
| H | -4.296661000 | 1.773287000  | -0.658508000 |
| H | -4.298291000 | 1.883982000  | -2.447860000 |
| C | 2.719373000  | 3.847955000  | -1.954410000 |
| H | 3.697039000  | 3.378379000  | -2.087018000 |
| H | 2.511395000  | 4.495277000  | -2.817774000 |
| H | 2.738573000  | 4.460412000  | -1.041822000 |
| C | 0.530052000  | -2.681799000 | -0.789434000 |
| C | -0.721793000 | -3.424993000 | -1.144104000 |
| C | -0.730425000 | -4.811016000 | -1.296600000 |
| H | -1.669615000 | -5.332541000 | -1.467193000 |
| C | 0.465897000  | -5.526503000 | -1.281296000 |
| H | 0.451687000  | -6.608568000 | -1.391851000 |
| C | 1.718715000  | -4.851086000 | -1.178145000 |
| H | 2.638601000  | -5.428120000 | -1.235090000 |
| C | 1.760575000  | -3.496395000 | -1.009177000 |
| C | -3.036497000 | -3.183984000 | -1.557393000 |
| H | -3.734662000 | -2.355116000 | -1.693962000 |
| H | -3.089088000 | -3.851747000 | -2.429682000 |
| H | -3.320727000 | -3.743706000 | -0.655025000 |
| C | 4.116786000  | -3.374466000 | -1.044633000 |
| H | 4.875873000  | -2.591754000 | -0.970489000 |
| H | 4.275650000  | -4.110042000 | -0.243349000 |
| H | 4.210632000  | -3.881747000 | -2.015858000 |
| H | 0.440967000  | -1.143744000 | 5.257345000  |
| H | 0.530086000  | -2.274734000 | 3.894724000  |
| H | -1.043460000 | -1.702064000 | 4.462170000  |
| H | 3.194656000  | -0.268766000 | 1.790485000  |
| H | 2.473998000  | -1.617171000 | 2.672720000  |
| H | 3.148345000  | -0.237144000 | 3.564928000  |

|   |              |              |              |
|---|--------------|--------------|--------------|
| H | 2.761733000  | 2.531349000  | 1.883735000  |
| H | 1.505442000  | 3.089049000  | 0.768678000  |
| H | 2.436132000  | 1.637343000  | 0.387841000  |
| H | -0.656323000 | 3.447564000  | 0.938359000  |
| H | -0.927883000 | 3.786921000  | 2.657241000  |
| H | -2.134998000 | 2.893258000  | 1.720676000  |
| H | -3.026630000 | 1.239898000  | 3.057282000  |
| H | -2.272266000 | 1.351807000  | 4.655293000  |
| H | -2.652329000 | -0.233437000 | 3.960942000  |
| C | -2.172571000 | -0.640735000 | 0.706518000  |
| O | -3.302219000 | -0.856187000 | 0.548959000  |
| O | 2.868786000  | -2.742651000 | -0.918258000 |
| O | -1.761696000 | -2.615443000 | -1.420374000 |
| O | -2.554820000 | 1.141750000  | -1.598908000 |
| O | 1.784470000  | 2.802555000  | -1.855157000 |
| C | 0.757483000  | -1.243267000 | -2.832486000 |
| H | -0.041555000 | -1.791390000 | -3.352762000 |
| H | 1.724827000  | -1.641698000 | -3.157719000 |
| C | 0.643128000  | 0.266344000  | -3.013937000 |
| H | 1.611734000  | 0.745670000  | -3.201987000 |
| H | -0.046980000 | 0.548905000  | -3.816939000 |

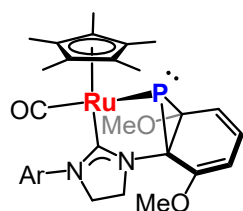

4

Gibbs free energy = -6571.8032078731

Electronic energy = -6572.3652531931

Imaginary frequency = NO

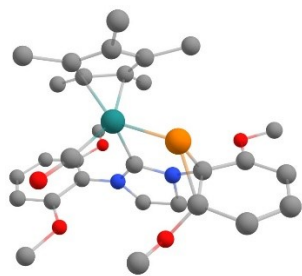

$\text{RuC}_{30}\text{PN}_2\text{H}_{37}\text{O}_5$

|    |              |              |              |
|----|--------------|--------------|--------------|
| Ru | -0.521016000 | -0.219961000 | 1.216566000  |
| P  | -0.263184000 | -2.535087000 | 0.934466000  |
| N  | -0.101639000 | 0.794228000  | -1.672223000 |
| N  | 0.720198000  | -1.172825000 | -1.266831000 |
| C  | -0.022468000 | -0.302605000 | 3.399345000  |
| C  | -0.483456000 | -1.312560000 | 4.398316000  |
| C  | -0.636987000 | 0.955030000  | 3.098003000  |
| C  | -1.880484000 | 1.502019000  | 3.721832000  |
| C  | 0.211936000  | 1.677149000  | 2.188832000  |
| C  | 0.038898000  | 3.107103000  | 1.796244000  |
| C  | 1.359183000  | 0.848921000  | 1.927956000  |
| C  | 2.532560000  | 1.210961000  | 1.076911000  |
| C  | 1.226209000  | -0.355256000 | 2.675530000  |
| C  | 2.243047000  | -1.441625000 | 2.787058000  |
| C  | 0.023553000  | -0.155631000 | -0.727345000 |
| C  | -0.760593000 | 2.032338000  | -1.558547000 |
| C  | -2.163436000 | 2.096095000  | -1.648746000 |
| C  | -2.809825000 | 3.337098000  | -1.566055000 |
| H  | -3.893527000 | 3.401261000  | -1.599885000 |
| C  | -2.048091000 | 4.498156000  | -1.473398000 |
| H  | -2.554314000 | 5.461214000  | -1.421525000 |
| C  | -0.657098000 | 4.461561000  | -1.462597000 |
| H  | -0.087236000 | 5.384560000  | -1.405620000 |
| C  | -0.013506000 | 3.220002000  | -1.506724000 |
| C  | -4.199206000 | 0.936206000  | -1.948328000 |
| H  | -4.499970000 | -0.100675000 | -2.111722000 |
| H  | -4.669796000 | 1.295694000  | -1.024747000 |
| H  | -4.532991000 | 1.547932000  | -2.798155000 |
| C  | 2.142684000  | 4.214249000  | -1.499356000 |
| H  | 3.175499000  | 3.857197000  | -1.515440000 |
| H  | 1.960633000  | 4.835254000  | -2.387114000 |
| H  | 1.987833000  | 4.821482000  | -0.596462000 |
| C  | 0.721472000  | -2.466556000 | -0.676929000 |
| C  | -0.611039000 | -3.199497000 | -0.793972000 |
| C  | -0.487178000 | -4.664501000 | -0.924563000 |
| H  | -1.407765000 | -5.241606000 | -1.009375000 |
| C  | 0.713146000  | -5.285826000 | -0.953053000 |
| H  | 0.747522000  | -6.372525000 | -1.032336000 |
| C  | 1.974751000  | -4.577075000 | -0.909259000 |

|   |              |              |              |
|---|--------------|--------------|--------------|
| H | 2.901657000  | -5.142297000 | -0.951307000 |
| C | 1.975184000  | -3.221499000 | -0.825198000 |
| C | -2.868016000 | -2.805399000 | -1.307218000 |
| H | -3.472102000 | -2.166046000 | -1.957266000 |
| H | -3.175279000 | -3.850976000 | -1.463890000 |
| H | -3.058180000 | -2.532861000 | -0.259495000 |
| C | 4.322590000  | -3.028320000 | -0.965588000 |
| H | 5.058500000  | -2.220544000 | -0.981916000 |
| H | 4.530684000  | -3.691814000 | -0.114285000 |
| H | 4.397488000  | -3.609834000 | -1.895513000 |
| H | 0.035152000  | -1.181835000 | 5.359315000  |
| H | -0.286900000 | -2.334198000 | 4.051870000  |
| H | -1.558920000 | -1.226399000 | 4.584879000  |
| H | 2.895907000  | -1.473528000 | 1.908496000  |
| H | 1.769096000  | -2.426163000 | 2.879033000  |
| H | 2.872130000  | -1.285949000 | 3.675055000  |
| H | 3.299350000  | 1.726596000  | 1.672563000  |
| H | 2.236141000  | 1.868267000  | 0.254790000  |
| H | 2.992598000  | 0.318340000  | 0.639448000  |
| H | 0.723173000  | 3.374267000  | 0.987949000  |
| H | 0.255119000  | 3.771719000  | 2.646180000  |
| H | -0.978700000 | 3.323601000  | 1.454164000  |
| H | -2.404248000 | 2.180136000  | 3.039554000  |
| H | -1.636142000 | 2.067992000  | 4.631990000  |
| H | -2.577072000 | 0.705334000  | 4.002833000  |
| C | -2.326463000 | -0.182301000 | 0.897311000  |
| O | -3.486581000 | -0.135790000 | 0.834080000  |
| O | 3.059199000  | -2.424066000 | -0.842355000 |
| O | -1.524207000 | -2.594602000 | -1.647497000 |
| O | -2.796184000 | 0.932744000  | -1.840668000 |
| O | 1.325841000  | 3.068148000  | -1.498029000 |
| C | 0.931425000  | -1.025174000 | -2.703234000 |
| H | 0.265278000  | -1.715626000 | -3.237590000 |
| H | 1.970038000  | -1.247350000 | -2.970147000 |
| C | 0.556828000  | 0.437215000  | -2.931346000 |
| H | 1.432977000  | 1.079979000  | -3.085195000 |
| H | -0.131686000 | 0.576336000  | -3.772526000 |

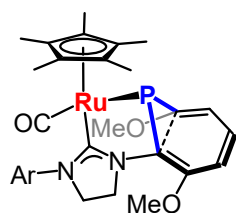

#### TS4

Gibbs free energy = -6571.7813819619

Electronic energy = -6572.3420474519

Imaginary frequency = -238.2

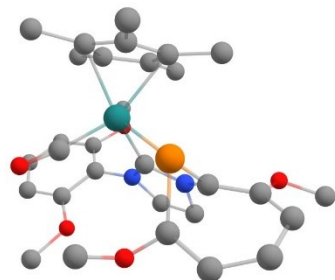

$\text{RuC}_{30}\text{PN}_2\text{H}_{37}\text{O}_5$

|    |              |              |              |
|----|--------------|--------------|--------------|
| Ru | -0.483044000 | -0.113330000 | 1.215362000  |
| P  | -0.254416000 | -2.444837000 | 0.909352000  |
| N  | 0.141708000  | 0.877483000  | -1.630942000 |
| N  | 0.922097000  | -1.098066000 | -1.151169000 |
| C  | 0.014417000  | -0.355350000 | 3.393661000  |
| C  | -0.400938000 | -1.459820000 | 4.306915000  |
| C  | -0.639684000 | 0.897786000  | 3.200859000  |
| C  | -1.895126000 | 1.352893000  | 3.871814000  |
| C  | 0.181991000  | 1.717358000  | 2.342522000  |
| C  | -0.056043000 | 3.159185000  | 2.035062000  |
| C  | 1.351070000  | 0.954316000  | 2.013693000  |
| C  | 2.511474000  | 1.425415000  | 1.200379000  |
| C  | 1.254304000  | -0.321339000 | 2.646847000  |
| C  | 2.301527000  | -1.385634000 | 2.664601000  |
| C  | 0.192976000  | -0.062443000 | -0.671740000 |
| C  | -0.657213000 | 2.037217000  | -1.628001000 |
| C  | -2.016333000 | 1.924763000  | -1.972819000 |
| C  | -2.830953000 | 3.063167000  | -1.989145000 |
| H  | -3.891127000 | 2.985963000  | -2.212455000 |
| C  | -2.259290000 | 4.305222000  | -1.730096000 |
| H  | -2.890676000 | 5.192653000  | -1.745478000 |
| C  | -0.898512000 | 4.447784000  | -1.471608000 |
| H  | -0.477942000 | 5.434233000  | -1.298502000 |

|   |              |              |              |
|---|--------------|--------------|--------------|
| C | -0.089885000 | 3.305753000  | -1.435544000 |
| C | -3.770957000 | 0.493545000  | -2.657119000 |
| H | -3.859302000 | -0.560171000 | -2.931170000 |
| H | -4.442177000 | 0.708034000  | -1.815406000 |
| H | -4.051201000 | 1.113033000  | -3.520643000 |
| C | 1.890780000  | 4.578643000  | -1.133822000 |
| H | 2.956476000  | 4.363342000  | -1.022820000 |
| H | 1.734775000  | 5.179497000  | -2.040124000 |
| H | 1.548941000  | 5.149688000  | -0.259140000 |
| C | 0.900720000  | -2.329939000 | -0.497354000 |
| C | -0.994116000 | -3.210681000 | -0.577896000 |
| C | -0.742598000 | -4.564811000 | -0.876012000 |
| H | -1.568644000 | -5.099238000 | -1.352153000 |
| C | 0.453757000  | -5.240717000 | -0.680433000 |
| H | 0.434805000  | -6.327923000 | -0.767299000 |
| C | 1.724927000  | -4.641340000 | -0.601174000 |
| H | 2.587657000  | -5.304008000 | -0.631497000 |
| C | 1.927536000  | -3.271141000 | -0.735387000 |
| C | -3.216158000 | -2.563743000 | -0.554497000 |
| H | -3.892329000 | -1.873147000 | -1.063180000 |
| H | -3.677819000 | -3.561701000 | -0.515201000 |
| H | -3.051461000 | -2.209024000 | 0.471066000  |
| C | 4.085482000  | -3.575682000 | -1.703134000 |
| H | 4.861100000  | -2.931676000 | -2.128635000 |
| H | 4.545253000  | -4.214503000 | -0.935128000 |
| H | 3.671187000  | -4.219242000 | -2.493089000 |
| H | 0.158144000  | -1.414180000 | 5.252511000  |
| H | -0.209113000 | -2.439568000 | 3.852499000  |
| H | -1.468103000 | -1.403503000 | 4.544884000  |
| H | 2.975131000  | -1.304917000 | 1.804811000  |
| H | 1.854036000  | -2.387398000 | 2.636292000  |
| H | 2.908878000  | -1.316511000 | 3.578212000  |
| H | 3.245501000  | 1.936195000  | 1.839528000  |
| H | 2.192078000  | 2.118778000  | 0.417959000  |
| H | 3.021024000  | 0.585731000  | 0.715953000  |
| H | 0.535194000  | 3.476658000  | 1.173168000  |
| H | 0.227031000  | 3.793522000  | 2.888195000  |
| H | -1.108207000 | 3.359225000  | 1.806100000  |
| H | -2.459724000 | 2.045906000  | 3.239068000  |

|   |              |              |              |
|---|--------------|--------------|--------------|
| H | -1.661167000 | 1.875609000  | 4.810043000  |
| H | -2.551727000 | 0.511112000  | 4.114359000  |
| C | -2.226450000 | 0.207868000  | 0.730640000  |
| O | -3.335829000 | 0.498690000  | 0.540897000  |
| O | 3.106883000  | -2.727788000 | -1.160901000 |
| O | -2.003154000 | -2.611187000 | -1.277803000 |
| O | -2.426781000 | 0.692672000  | -2.294675000 |
| O | 1.240816000  | 3.333208000  | -1.227542000 |
| C | 1.259834000  | -0.948372000 | -2.565683000 |
| H | 0.664672000  | -1.661843000 | -3.152638000 |
| H | 2.319144000  | -1.155829000 | -2.734346000 |
| C | 0.876895000  | 0.504421000  | -2.839986000 |
| H | 1.750505000  | 1.158387000  | -2.959491000 |
| H | 0.235503000  | 0.615317000  | -3.721562000 |

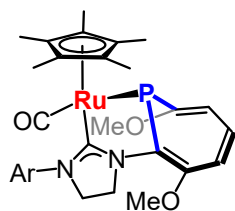

3

Gibbs free energy = -6571.8015908906

Electronic energy = -6572.3618458906

Imaginary frequency = NO

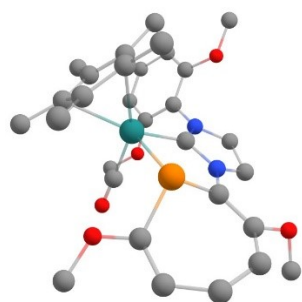

$\text{RuC}_{30}\text{PN}_2\text{H}_{37}\text{O}_5$

|    |             |             |              |
|----|-------------|-------------|--------------|
| Ru | 2.157575000 | 3.216342000 | 10.176483000 |
| P  | 2.950975000 | 3.919503000 | 12.238285000 |
| N  | 2.169089000 | 5.856383000 | 8.601085000  |
| N  | 3.138474000 | 6.001748000 | 10.547022000 |
| C  | 1.091863000 | 1.509599000 | 11.152217000 |
| C  | 1.509506000 | 0.798009000 | 12.397657000 |

|   |              |              |              |
|---|--------------|--------------|--------------|
| C | 1.418966000  | 1.143034000  | 9.811664000  |
| C | 2.277595000  | -0.011815000 | 9.405382000  |
| C | 0.682770000  | 1.995803000  | 8.910866000  |
| C | 0.591954000  | 1.820344000  | 7.431696000  |
| C | -0.090978000 | 2.891293000  | 9.711686000  |
| C | -1.130312000 | 3.845855000  | 9.223501000  |
| C | 0.160504000  | 2.609964000  | 11.088823000 |
| C | -0.529940000 | 3.232995000  | 12.256273000 |
| C | 2.463674000  | 5.158671000  | 9.714815000  |
| C | 1.611797000  | 5.379492000  | 7.400161000  |
| C | 2.397652000  | 4.632998000  | 6.503889000  |
| C | 1.871173000  | 4.256393000  | 5.261105000  |
| H | 2.459364000  | 3.664550000  | 4.565610000  |
| C | 0.584167000  | 4.657788000  | 4.918231000  |
| H | 0.175856000  | 4.362890000  | 3.952414000  |
| C | -0.193508000 | 5.436140000  | 5.772471000  |
| H | -1.188949000 | 5.748173000  | 5.469324000  |
| C | 0.333972000  | 5.816754000  | 7.012728000  |
| C | 4.460698000  | 3.547515000  | 6.098139000  |
| H | 5.388964000  | 3.401400000  | 6.653388000  |
| H | 4.001330000  | 2.566698000  | 5.912515000  |
| H | 4.675547000  | 4.034670000  | 5.136499000  |
| C | -1.600063000 | 7.057925000  | 7.591861000  |
| H | -1.919525000 | 7.672308000  | 8.437068000  |
| H | -1.610445000 | 7.669261000  | 6.678716000  |
| H | -2.301477000 | 6.220184000  | 7.473049000  |
| C | 3.571059000  | 5.587964000  | 11.805451000 |
| C | 4.567582000  | 3.113392000  | 12.621351000 |
| C | 5.386462000  | 3.553651000  | 13.614862000 |
| H | 6.222862000  | 2.925731000  | 13.925606000 |
| C | 5.189273000  | 4.753502000  | 14.393503000 |
| H | 5.558133000  | 4.701183000  | 15.421183000 |
| C | 4.682926000  | 5.952987000  | 14.007739000 |
| H | 4.691917000  | 6.759621000  | 14.745653000 |
| C | 4.232719000  | 6.378657000  | 12.696743000 |
| C | 5.969719000  | 1.258497000  | 12.133878000 |
| H | 5.955669000  | 0.430533000  | 11.419865000 |
| H | 6.840866000  | 1.898184000  | 11.934405000 |
| H | 6.049767000  | 0.855478000  | 13.153980000 |

|   |              |              |              |
|---|--------------|--------------|--------------|
| C | 5.806219000  | 8.097413000  | 12.357305000 |
| H | 5.830756000  | 9.181762000  | 12.209311000 |
| H | 6.353785000  | 7.850231000  | 13.278077000 |
| H | 6.313527000  | 7.606964000  | 11.511213000 |
| H | 0.788653000  | 0.008117000  | 12.653908000 |
| H | 1.564332000  | 1.488099000  | 13.247490000 |
| H | 2.495425000  | 0.337032000  | 12.282711000 |
| H | -0.958353000 | 4.205522000  | 11.990416000 |
| H | 0.166475000  | 3.394219000  | 13.088744000 |
| H | -1.347937000 | 2.593669000  | 12.619119000 |
| H | -2.131001000 | 3.462483000  | 9.468350000  |
| H | -1.079653000 | 3.970058000  | 8.138858000  |
| H | -1.030825000 | 4.834768000  | 9.681226000  |
| H | 0.252870000  | 2.735856000  | 6.939288000  |
| H | -0.116674000 | 1.018347000  | 7.174574000  |
| H | 1.560712000  | 1.555056000  | 6.994187000  |
| H | 2.783597000  | 0.180074000  | 8.452905000  |
| H | 1.673928000  | -0.922524000 | 9.283887000  |
| H | 3.046487000  | -0.217247000 | 10.157454000 |
| C | 3.848034000  | 2.938145000  | 9.533262000  |
| O | 4.911074000  | 2.726227000  | 9.118774000  |
| O | 4.453163000  | 7.713661000  | 12.431053000 |
| O | 4.770070000  | 1.966344000  | 11.951554000 |
| O | 3.639797000  | 4.350807000  | 6.910418000  |
| O | -0.303722000 | 6.604332000  | 7.896165000  |
| C | 3.381661000  | 7.320526000  | 9.958654000  |
| H | 4.458025000  | 7.474765000  | 9.814355000  |
| H | 3.016063000  | 8.109559000  | 10.617608000 |
| C | 2.622565000  | 7.244735000  | 8.639241000  |
| H | 1.760333000  | 7.922092000  | 8.605460000  |
| H | 3.261024000  | 7.451160000  | 7.771789000  |

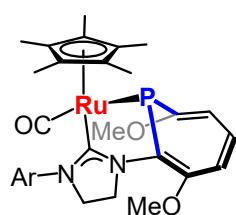

**3 (triplet state)**

Gibbs free energy = -6571.7605135804

Electronic energy = -6572.3182635004

Imaginary frequency = NO

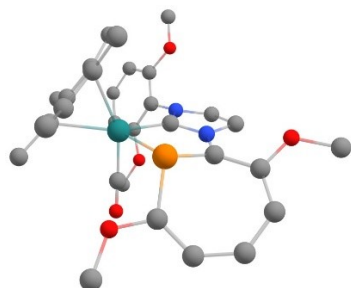

RuC<sub>30</sub>PN<sub>2</sub>H<sub>37</sub>O<sub>5</sub>

|    |              |              |              |
|----|--------------|--------------|--------------|
| Ru | 2.208446000  | 3.156245000  | 10.122709000 |
| P  | 3.268286000  | 3.821093000  | 12.060266000 |
| N  | 2.159720000  | 5.833482000  | 8.567356000  |
| N  | 3.189062000  | 5.937762000  | 10.490912000 |
| C  | 1.069318000  | 1.544974000  | 11.178376000 |
| C  | 1.466556000  | 0.820192000  | 12.421880000 |
| C  | 1.317709000  | 1.130970000  | 9.835556000  |
| C  | 2.067708000  | -0.094618000 | 9.422106000  |
| C  | 0.614277000  | 2.022722000  | 8.943234000  |
| C  | 0.463690000  | 1.834843000  | 7.470416000  |
| C  | -0.058547000 | 2.988682000  | 9.753473000  |
| C  | -1.030984000 | 4.020928000  | 9.285791000  |
| C  | 0.227738000  | 2.715442000  | 11.126653000 |
| C  | -0.362401000 | 3.415867000  | 12.305907000 |
| C  | 2.515301000  | 5.105221000  | 9.654208000  |
| C  | 1.645870000  | 5.353569000  | 7.349667000  |
| C  | 2.445398000  | 4.578881000  | 6.488573000  |
| C  | 1.939995000  | 4.168951000  | 5.247338000  |
| H  | 2.536121000  | 3.550339000  | 4.582641000  |
| C  | 0.666938000  | 4.576079000  | 4.862233000  |
| H  | 0.275863000  | 4.255053000  | 3.897693000  |
| C  | -0.114684000 | 5.397997000  | 5.670824000  |
| H  | -1.094866000 | 5.721049000  | 5.331837000  |
| C  | 0.390795000  | 5.809533000  | 6.910029000  |
| C  | 4.529039000  | 3.521346000  | 6.116830000  |
| H  | 5.460440000  | 3.407110000  | 6.673904000  |
| H  | 4.100153000  | 2.525343000  | 5.940510000  |
| H  | 4.730520000  | 4.006356000  | 5.151345000  |

|   |              |              |              |
|---|--------------|--------------|--------------|
| C | -1.528749000 | 7.111302000  | 7.394025000  |
| H | -1.852658000 | 7.769922000  | 8.203556000  |
| H | -1.511834000 | 7.679634000  | 6.453668000  |
| H | -2.242941000 | 6.281062000  | 7.300485000  |
| C | 3.755488000  | 5.482116000  | 11.675034000 |
| C | 4.817270000  | 2.967337000  | 12.398891000 |
| C | 5.987921000  | 3.498961000  | 12.926447000 |
| H | 6.787659000  | 2.780210000  | 13.109999000 |
| C | 6.304824000  | 4.802593000  | 13.330792000 |
| H | 7.281231000  | 4.891357000  | 13.808841000 |
| C | 5.572907000  | 6.028662000  | 13.299630000 |
| H | 5.994702000  | 6.808701000  | 13.932143000 |
| C | 4.458922000  | 6.372508000  | 12.572203000 |
| C | 5.662060000  | 0.730843000  | 12.569477000 |
| H | 5.279839000  | -0.270983000 | 12.351936000 |
| H | 6.588545000  | 0.887615000  | 11.997671000 |
| H | 5.891743000  | 0.802601000  | 13.643187000 |
| C | 4.521894000  | 8.620314000  | 13.390215000 |
| H | 3.928006000  | 9.528554000  | 13.253270000 |
| H | 4.556367000  | 8.376198000  | 14.462192000 |
| H | 5.548350000  | 8.802795000  | 13.038436000 |
| H | 0.687894000  | 0.099204000  | 12.710197000 |
| H | 1.607317000  | 1.514678000  | 13.257349000 |
| H | 2.407110000  | 0.279233000  | 12.286803000 |
| H | -0.684379000 | 4.429809000  | 12.044785000 |
| H | 0.364586000  | 3.499186000  | 13.122565000 |
| H | -1.239087000 | 2.874108000  | 12.690262000 |
| H | -2.035094000 | 3.785619000  | 9.664768000  |
| H | -1.084413000 | 4.047735000  | 8.194266000  |
| H | -0.768145000 | 5.025599000  | 9.630850000  |
| H | 0.179434000  | 2.767078000  | 6.974251000  |
| H | -0.310577000 | 1.085054000  | 7.247748000  |
| H | 1.396310000  | 1.492505000  | 7.009018000  |
| H | 2.554435000  | 0.041846000  | 8.450370000  |
| H | 1.389425000  | -0.955535000 | 9.336702000  |
| H | 2.843031000  | -0.349645000 | 10.151859000 |
| C | 3.854525000  | 2.764690000  | 9.416297000  |
| O | 4.900016000  | 2.458610000  | 9.020274000  |
| O | 3.891580000  | 7.611590000  | 12.648853000 |

|   |              |             |              |
|---|--------------|-------------|--------------|
| O | 4.657820000  | 1.631066000 | 12.188475000 |
| O | 3.682644000  | 4.308407000 | 6.919564000  |
| O | -0.246862000 | 6.650472000 | 7.743510000  |
| C | 3.224036000  | 7.320257000 | 10.011439000 |
| H | 4.238599000  | 7.725269000 | 10.071164000 |
| H | 2.574937000  | 7.944595000 | 10.634066000 |
| C | 2.719522000  | 7.182936000 | 8.582575000  |
| H | 1.952388000  | 7.922299000 | 8.329697000  |
| H | 3.531572000  | 7.250121000 | 7.844129000  |

## References

1. M. Schedler, R. Fröhlich, C.-G. Daniliuc and F. Glorius, *Eur. J. Org. Chem.*, 2012, **2012**, 4164-4171.
2. S. Lehtola, C. Steigemann, M. J. T. Oliveira and M. A. L. Marques, *SoftwareX*, 2018, **7**, 1-5.
3. F. Neese, *WIREs Comput. Mol. Sci.*, 2012, **2**, 73-78.
4. F. Neese, *WIREs Comput. Mol. Sci.*, 2018, **8**, e1327.
5. F. Neese, F. Wennmohs, U. Becker and C. Riplinger, *J. Chem. Phys.*, 2020, **152**, 224108.
6. E. F. Valeev, \*Libint2: A Library for the Evaluation of Molecular Integrals of Two-Body Interaction Operators\*, <http://libint.valeev.net/>, 2025
7. C. Adamo and V. Barone, *J. Chem. Phys.*, 1999, **110**, 6158-6170.
8. J. P. Perdew, K. Burke and M. Ernzerhof, *Phys. Rev. Lett.*, 1996, **77**, 3865-3868.
9. M. Ernzerhof and G. E. Scuseria, *J. Chem. Phys.*, 1999, **110**, 5029-5036.
10. S. Grimme, J. Antony, S. Ehrlich and H. Krieg, *J. Chem. Phys.*, 2010, **132**, 154104.
11. S. Grimme, S. Ehrlich and L. Goerigk, *J. Comput. Chem.*, 2011, **32**, 1456-1465.
12. F. Weigend and R. Ahlrichs, *Phys. Chem. Chem. Phys.*, 2005, **7**, 3297-3305.
13. D. A. Pantazis and F. Neese, *J. Chem. Theory Comput.*, 2009, **5**, 2229-2238.
14. E. v. Lenthe, E. J. Baerends and J. G. Snijders, *J. Chem. Phys.*, 1993, **99**, 4597-4610.
15. G. L. Stoychev, A. A. Auer and F. Neese, *J. Chem. Theory Comput.*, 2017, **13**, 554-562.
16. F. Weigend, *Phys. Chem. Chem. Phys.*, 2006, **8**, 1057-1065.
17. D. A. Pantazis, X.-Y. Chen, C. R. Landis and F. Neese, *J. Chem. Theory Comput.*, 2008, **4**, 908-919.
18. D. A. Pantazis and F. Neese, *J. Chem. Theory Comput.*, 2011, **7**, 677-684.
19. D. A. Pantazis and F. Neese, *Theor. Chem. Acc.*, 2012, **131**, 1292.
20. V. Barone and M. Cossi, *J. Phys. Chem. A*, 1998, **102**, 1995-2001.
21. M. Cossi, N. Rega, G. Scalmani and V. Barone, *J. Comput. Chem.*, 2003, **24**, 669-681.
22. E. Caldeweyher, C. Bannwarth and S. Grimme, *J. Chem. Phys.*, 2017, **147**, 034112.
23. J. D. Rolfes, F. Neese and D. A. Pantazis, *J. Comput. Chem.*, 2020, **41**, 1842-1849.
24. A. Hellweg, C. Hättig, S. Höfener and W. Klopper, *Theor. Chem. Acc.*, 2007, **117**, 587-597.
25. T. Lu and F. Chen, *J. Comput. Chem.*, **2012**, **33**, 580-592.
26. T. Lu, *J. Chem. Phys.*, 2024, **161**, 082503.
27. W. Humphrey, A. Dalke and K. Schulten, *J. Mol. Graph.*, 1996, **14**, 33-38.
